1 Running head: Climate stress strengthens mutualistic adaptation

2 Strengthened mutualistic adaptation between teosinte and its rhizosphere biota in cold  
3 climates

4 Anna M. O'Brien<sup>1,2,3,4</sup>, Ruairidh J.H. Sawers<sup>5,6</sup>, Jaime Gasca-Pineda<sup>7</sup>, Ivan Baxter<sup>8</sup>, Luis E.  
5 Eguiarte<sup>7</sup>, Jeffrey Ross-Ibarra<sup>1-3,9</sup>, and Sharon Y. Strauss<sup>1,2</sup>

6 <sup>1</sup>Center for Population Biology, University of California, Davis, CA 95616

7 <sup>2</sup>Dept. of Evolution and Ecology, University of California, Davis, CA 95616

8 <sup>3</sup>Department of Plant Sciences, University of California, Davis, California, 95616

9 <sup>4</sup>Department of Ecology and Evolutionary Biology, University of Toronto, ON, Canada M5S 3B2

10 <sup>5</sup>Laboratorio Nacional de Genómica para la Biodiversidad, Centro de Investigación y de Estudios  
11 Avanzados del Instituto Politécnico Nacional, Irapuato, 36821, Guanajuato, México

12 <sup>6</sup>Department of Plant Science, Pennsylvania State University, State College, PA

13 <sup>7</sup>Laboratorio de Evolución Molecular y Experimental, Departamento de Ecología Evolutiva,  
14 Instituto de Ecología, Universidad Nacional Autónoma de México, AP, 70275 Coyoacán 04510  
15 Ciudad de México, México

16 <sup>8</sup>Donald Danforth Plant Science Center, 975 N. Warson Road, St. Louis, MO 63132

17 <sup>9</sup>Genome Center, University of California, Davis, CA 95616

18 Address correspondence to Anna M. O'Brien, [anna.obrien@utoronto.ca](mailto:anna.obrien@utoronto.ca), 416-978-7250

19

## 20 Summary

- 21 • While abiotic environments consistently shape local adaptation, the strength of local  
22 adaptation to biotic interactions may vary more. One theory, COCO (CO-evolutionary  
23 Outcomes across Conditionality), predicts it may be strongest where species experience  
24 greater stress, because stress increases fitness impacts of species interactions. For  
25 example, in plant interactions with rhizosphere biota, positive outcomes increase with  
26 stress from low soil fertility, drought and cold.
- 27 • To investigate the influence of abiotic stress gradients on adaptation between plants  
28 and rhizosphere biota, we used a greenhouse common garden experiment recombining  
29 teosinte, *Zea mays* ssp. *mexicana* (wild relative of maize), and rhizosphere biota,  
30 collected across a stress gradient (elevational variation in temperature, precipitation,  
31 and nutrients).
- 32 • We found stronger local adaptation between teosinte and rhizosphere biota from colder,  
33 more stressful sites, as expected by COCO. However, biota from less stressful, warmer  
34 sites provided greater average benefits across teosinte populations. Links between plant  
35 traits and 20-element profiles of plant leaves explained fitness variation, persisted in  
36 the field, were influenced by both plants and biota, and largely reflected patterns of  
37 local adaptation.
- 38 • In sum, we uncovered greater local adaptation to biotic interactions in colder sites, and  
39 that both plants and rhizosphere biota affect the expression of plant phenotypes.

40 Keywords: biotic interactions, stress-gradient, local adaptation, ionomics, phenotype  
41 expression, plant-rhizosphere interactions

## 42 Introduction

43 The striking power of both abiotic and biotic selective forces in evolution has been well-  
44 documented, yet meta-analyses reveal that while abiotic forces consistently drive strong local  
45 adaptation to sites across species and systems, local adaptation to biotic interactions is incon-  
46 sistent in strength (Briscoe Runquist et al., 2020; Hargreaves et al., 2020). This is not un-  
47 expected: fitness impacts of biotic interactions vary across abiotic conditions as the impacts  
48 of individual interactions or the composition of suites of interacting species shift (Cushman  
49 and Whitham, 1989; Strauss and Irwin, 2004; Chamberlain et al., 2014; Trøjelsgaard et al.,  
50 2015; Kemp et al., 2017), driving mosaics of co-evolution and co-adaptation (Thompson,

51 1982, 2005). One well-known pattern of shifting outcomes is the strengthening of benefits  
52 between partners across gradients of abiotic stress, heightening mutualisms (Johnson, 1993;  
53 Schwartz and Hoeksema, 1998; Bever, 2015) and attenuating competition or shifting it to  
54 facilitation (Bertness and Callaway, 1994; Callaway et al., 2002; He and Bertness, 2014).  
55 Altered adaptation to species interactions is then expected to follow such shifts in outcomes  
56 (Bronstein, 2009; O’Brien et al., 2018). Specifically, the “(co)evolutionary outcomes of con-  
57 ditionality” (COCO) hypothesis predicts increased mutualism and local adaptation in one  
58 or both interacting species in stressful sites where the interaction ameliorates the stressor’s  
59 effect (O’Brien et al., 2018).

60 For plants, one important class of biotic interaction is with the diverse community of  
61 organisms that live in, on, or near their roots (Hiltner, 1904; Bais et al., 2006; Raaijmakers  
62 et al., 2009; Lundberg et al., 2012; Toju et al., 2014). Though these interactions are primar-  
63 ily mutualisms involving exchange of plant photosynthetically-fixed carbon for nutritional  
64 benefits from biota (Smith and Read, 2008), outcomes for plants may sometimes be costly  
65 (e.g. Berg and Smalla, 2009; Smith and Read, 2008; Anacker et al., 2014). Like patterns  
66 across species, local adaptation between plants and components of their rhizosphere biota  
67 is variable in strength (Rúa et al., 2016). Because plant-rhizosphere interactions provide  
68 positive outcomes through ameliorating abiotic stress, they may shift to negative outcomes  
69 in the absence of that stress (Johnson, 1993), leading to the prediction of COCO and other  
70 theoretical frameworks that there should be stronger mutualistic adaptation between plants  
71 and microbes in high-stress sites such as those lacking in soil nutrients (Bever, 2015; O’Brien  
72 et al., 2018). In one tantalizing example, mycorrhizal fungi positively affect plants by allevi-  
73 ating phosphorus stress, and greater local adaptation between plants and fungi was observed  
74 in phosphorus-deficient sites compared to sites with less phosphorus stress (Johnson et al.,  
75 2010).

76 Here, we address the influence of abiotic environments on local adaptation between  
77 teosinte, *Zea mays* ssp. *mexicana*, a wild relative of domesticated maize (*Zea mays* ssp.  
78 *mays*) from the highlands of central Mexico (Sánchez and Corral, 1997) and its rhizosphere  
79 biota. We experimentally combined teosinte plants and rhizosphere biota from sites spanning  
80 an elevational range that also captured gradients in soil fertility, temperature, and precip-  
81 itation (O’Brien et al., 2019). These gradients may have synergistic effects: cold stress in  
82 plants is physiologically driven by water and nutrients as roots function poorly in the cold,  
83 leading to nutrient deficiencies and wilting (Bloom et al., 2004; Zhu et al., 2009), potentially  
84 exacerbating effects of dry or nutrient-poor sites. Rhizosphere biota can alleviate drought  
85 (Kivlin et al., 2013), cold (Zhu et al., 2009) and nutrient stress (Smith et al., 2010), and may  
86 therefore be most beneficial in dry, nutrient-poor, and cold sites. COCO predicts the most

87 evolved mutualistic benefits where interactions have the most beneficial outcomes. Benefits  
88 can be general and provided to any interacting partner, or they may be locally adapted and  
89 provided only to partners from the local population (O'Brien et al., 2018). We hypothesized  
90 that 1) biota from the most stressful sites (cold, dry, nutrient-poor) would provide the most  
91 general and locally adapted benefits.

92 In teosinte, many of the traits that underlie adaptive differentiation across elevation  
93 or cold stress (including phenology and height, Hufford et al., 2013; O'Brien et al., 2019;  
94 Fustier et al., 2019) also shift in response to changes in rhizosphere communities (O'Brien  
95 et al., 2019). Plant-rhizosphere interactions may simultaneously influence many different  
96 elements in plant tissues (e.g. the ionome, a 20-element profile, Baxter et al., 2008; Ramírez-  
97 Flores et al., 2017), and microbially driven shifts in plant tissue element concentrations  
98 are linked to shifts in plant traits from root architecture to flowering time (Desbrosses and  
99 Stougaard, 2011; Bulgarelli et al., 2013; Paszkowski and Gutjahr, 2013; Lu et al., 2018),  
100 suggesting an interplay between rhizosphere nutrient provisioning, and the expression of  
101 adaptive phenotypes. To investigate any such interplay between teosinte and rhizosphere  
102 biota, we identified plant phenotypes that co-varied with elemental profiles. We hypothesized  
103 that 2) adaptation associated with stress gradients (cold, fertility, precipitation) would shape  
104 co-varying plant traits and element profiles, i.e. that patterns in traits and elements would  
105 reflect general and locally adapted benefits from biota.

106 Finally, benefits provided to plants by biota should be greater when conditions match  
107 the local environment from which plants and biota were sourced and to which they may  
108 be locally adapted (Johnson et al., 2010; Lau and Lennon, 2012). We therefore measured  
109 element profiles and a subset of traits in the field, and tested whether 3) rhizosphere biota  
110 both provide greater benefits to teosinte at more stressful sites (cold, dry, nutrient-poor),  
111 and shift traits and elemental profiles as observed in the greenhouse.

## 112 **Materials and Methods**

### 113 **Characterization of field sites and collections**

114 We selected 10 populations of teosinte from central Mexico across its elevational range (Figure  
115 S1) that we expected to differ in soil fertility (based on underlying geology, Instituto Nacional  
116 de Estadística y Geografía, 2014) and climatic variables that were previously associated with  
117 shifting outcomes of plant-rhizosphere interactions and adaptation in *Zea* spp. and other  
118 plants (Sawers et al., 2009; Kivlin et al., 2013; O'Brien et al., 2019). Sites ranged 6.6°C in  
119 mean annual temperature (MAT), >1100 meters in elevation, and the wettest site received

120 nearly twice the annual precipitation of the driest site (information extracted with raster,  
121 Bioclim in R, Hijmans et al., 2005; Hijmans, 2015; R Core Team, 2019, Table S1). In  
122 August 2013, we collected 2 kg of teosinte rhizosphere soil from each population (pooled  
123 individuals spanning the spatial extent), stored briefly at 4°C, then sent it for analysis  
124 at INIFAP, Laboratorio Nacional de Fertilidad de Suelos y Nutrición Vegetal. Sites had  
125 an  $\approx 10$ -fold difference in extractable soil phosphorous (29.7-223 ppm) and potassium (96-  
126 1055 ppm), and inorganic nitrogen ranged from 12 to 17.6 ppm. These variables did not  
127 shift independently across sites: as MAT increased, so did precipitation, soil water holding  
128 capacity, phosphorus, and potassium, but inorganic nitrogen decreased ( $\rho$  is 0.30, 0.55, 0.41,  
129 0.54, and -0.27, respectively).

130 In December 2013, after plant senescence and seed set, we collected seeds from 12 different  
131 mother plants per population, chosen to span the population spatial extent and have sufficient  
132 seed quantity, and stored at 4°C until use. At the same time, we scored coarse phenology of  
133 each population, and collected rhizosphere biota. Approximately 6 liters (4-7 L) of roots and  
134 attached soil were collected from plants spanning the whole population at each site. Plants  
135 were unearthed and roots lightly shaken, and then roots and loosely-adhering soil were  
136 placed in bags, dried at ambient temperature, and stored at 4°C. To make biota inoculum  
137 for each source site, bag contents were homogenized in a blender until root pieces were  
138 approximately  $\leq 2$  cm in length and well mixed with soil. While pooling soil samples within  
139 sites can homogenize within site variation, homogenization effects should be unbiased with  
140 respect to local adaptation between plants and rhizosphere biota. To characterize abundance  
141 of a key rhizosphere microbe in inocula, we extracted arbuscular mycorrhizal spores from  
142 homogenized inocula (density gradient method Furlan et al., 1980).

### 143 **Testing whether biota from stressful sites provide more general and locally** 144 **adapted benefits**

145 In May of 2014, we grew seeds from each teosinte population in each of six inoculum treat-  
146 ments: no inoculum, sympatric inoculum (collected from same site, contrasted with “al-  
147 lopatric,” collected from different sites), and inocula from four sites selected from the 10.  
148 These treatments ensured that each teosinte population experienced biota from its home site  
149 and biota from allopatric sites. The four plant populations from which these selected inocula  
150 came received doubled replicates of the sympatric treatment, and three allopatric treatments,  
151 while other populations received four allopatric treatments (see Figure S2). Source sites used  
152 for the shared biota inocula treatments spanned the range of described environmental vari-  
153 ables (Table S1, Figure S2).

154 We grew sibling seeds from 12 mothers from each of the 10 teosinte populations (120

155 mothers  $\times$  6 treatments = 720 plants). We added four drainage holes to 2 L plastic grow  
156 bags, and filled with 1.5 L of sterile potting mix (90% sand, 5% perlite 5% vermiculite  
157 0.2% silt, steam sterilized for 4 hours at 90°C using a PRO-GROW SS60). We inoculated  
158 each pot with 50 mL of 4:1 sterilized sand and homogenized inocula (sterilized sand only in  
159 uninoculated treatment) just below where seeds were to be placed, and topped with sterilized  
160 soil, resulting in a live layer of inocula sandwiched between sterilized soils. As only 0.5% of  
161 pot volume is inocula, we expect any non-biotic inocula effects to be minimal relative to biotic  
162 effects. We added three seeds from the same maternal plant family to pre-watered pots after  
163 scarification with overnight soaking, and thinned to one seedling after germination. Pots  
164 were randomly arranged on a bench in a temperature- and humidity-controlled greenhouse  
165 in Irapuato, Gto, Mexico (average temperature 23.8°C during the experiment). We treated  
166 plants with Agrimycin and Knack in dual-application one time to prevent caterpillar and  
167 spider mite herbivory. We kept pots unfertilized and moist for the first two weeks as most  
168 plants germinated, after which we watered and fertilized weekly with 50 mL of Hoagland’s  
169 solution adjusted to low phosphorous (100 $\mu$ M). We chose this low nutrient and phosphorous  
170 regime to increase stress that rhizosphere interactions could alleviate (Smith et al., 2010),  
171 as recommended for tests of COCO (O’Brien et al., 2018).

172 At 52 days post-germination (dpg), we harvested plants. When many plants were due  
173 for harvest on a particular day, we harvested over several days in random order; most plants  
174 were harvested within one or two days of 52 dpg (Figure S3; range 29-67 dpg). We measured  
175 traits (see below), then quantified a fitness proxy: pre-reproduction vegetative dry biomass,  
176 which predicts fitness in the related subspecies *Zea mays* ssp. *parviglumis* (Piperno et al.,  
177 2015, as analyzed in O’Brien et al., 2019). We washed plants of adhering soil, split into roots  
178 and shoots, dried ( $\approx$  45°C until mass stabilized), and weighed.

179 We related our fitness proxy, biomass, to abiotic environments at plant and biota source  
180 sites with linear models (Bayesian methods, MCMCglmm Hadfield, 2010). Our environmen-  
181 tal variables included our three soil fertility measures (logged when normality improved), soil  
182 water holding capacity, and climatic variables (site mean annual temperature, mean annual  
183 precipitation). We explicitly tested whether biota effects on plant fitness are correlated to  
184 the environment at their source sites ( $E_B$ ), whether local adaptation alters these effects ( $S$ ),  
185 and whether local adaptation is environment-specific ( $E_S \times S$ ) by fitting:

$$Y \sim \alpha + \beta_{E_P} E_P + \beta_{E_B} E_B + \beta_S S + \beta_{E \times S} E_S \times S + N_M(0, \epsilon_P) + \epsilon, \quad (1)$$

186 where  $\beta$ s are slopes, and  $\alpha$  is the intercept. Biota source environment effects ( $\beta_{E_B}$ ) may be  
187 a combination of species assemblage differences and divergence within rhizosphere species.  
188 Sympatric effects ( $\beta_S$  and/or  $\beta_{E \times S}$ ) may be plant- or biota- based. If  $\beta_S$  is positive, it may



189 indicate local adaptation of plants to perform better in local biota, or filtering of biota via  
190 competitive exclusion or selection that results in biota that better support local plants. If  
191 negative,  $\beta_S$  may indicate biota that grow more themselves at the expense of local plants.  
192 Significant  $\beta_{E \times S}$  would indicate a strengthening or weakening of local adaptation across  
193 abiotic gradients. We define all possible sources of  $\beta_S$  and  $\beta_{E \times S}$  as local adaptation, as  
194 all involve a local-genotype dependent effect. As stress decreases with increases in our  $E$   
195 variables, COCO predicts negative  $\beta_{EB}$  (biota from colder, drier, and nutrient-poor sites more  
196 beneficial) and negative  $\beta_{E \times S}$  with a positive  $\beta_S$  (biota from colder, drier, and nutrient-poor  
197 sites provide even greater benefits to sympatric plants).

198 We include plant source environment effects ( $\beta_{EP}$ ), as it is important to account for  
199 population effects when testing for local adaptation (Blanquart et al., 2013; O'Brien et al.,  
200 2018), which could include genetic differences across populations and transgenerational envi-  
201 ronment responses (i.e. maternal effects).  $\epsilon_P$  is a random effect for family (which can shape  
202 variation in teosinte, O'Brien et al., 2019, Table S3), and  $\varepsilon$  is error. We fit this model using  
203 each environmental variable in turn, removing non-significant terms until DIC (Bayesian  
204 version of AIC, Spiegelhalter et al., 2002) stopped reducing or no non-significant terms re-  
205 mained (terms were removed one at a time, starting with most-complex and least significant  
206 based on pMCMC). We report the model for only the best fitting environmental variable,  
207 quantifying uncertainty with highest posterior density intervals (HPDI, Bayesian equivalent  
208 of confidence intervals, Plummer et al., 2006).

## 209 **Testing whether stress gradients and local adaptation shape traits and element** 210 **profiles**

211 We measured plant traits largely from within the set of previously known adaptive or  
212 rhizosphere-influenced traits in teosinte or *Zea mays* subspecies (Kaur et al., 1985; Lauter,  
213 2004; Hufford et al., 2013; López et al., 2011; O'Brien et al., 2019). We recorded germination  
214 date, measured height to the highest ligule at five timepoints, and length and width of the  
215 second true leaf when expanded. At harvest we measured: final height, stem width (at the  
216 first node above the soil), leaf number, and number of stem macrohairs in 1 cm<sup>2</sup> below the  
217 ligule on the edge of the lowest live leaf sheath. Some plants germinated much later than  
218 others (14 plants surviving to harvest germinated 30-72 days late). These were excluded  
219 from analyses including multivariate trait axes (see below) as they could not be measured  
220 for all traits, though they were included for biomass, above. We characterized growth timing  
221 by fitting parabolic growth curves to height measurements using days since emergence and  
222 the square of days (linear models in R,  $height \sim \alpha + \beta_1 days + \beta_2 days^2$ ). We extracted the  
223 coefficient for the squared term ( $\beta_2$ ), which separated plants into early ( $\beta_2 < 0$  plants grew

224 quickly early, with decreasing growth rate through time, no plants had negative growth),  
225 or delayed growers ( $\beta_2 > 0$ , plants initially grew slowly, and increased growth rate through  
226 time, see Figure S3). We sampled the youngest (most apical) fully expanded leaf, dried at  
227 45°C then processed at Donald Danforth Plant Science Center to quantify plant tissue con-  
228 centration of 20 elements using inductively coupled plasma mass spectrometry (as in Baxter  
229 et al., 2008, ICP-MS, ionomics, see Figure 2 for list).

230 Most element concentrations and some traits were not normally distributed. We took  
231 the natural log when this improved normality, but for phenotypes, we restricted taking the  
232 log to only traits where the Shapiro W statistic was  $< 0.9$ , evaluated in R; after necessary  
233 transformations all W were  $> 0.75$ , Figure S4). For all elements, we included greenhouse and  
234 field (see below) samples when evaluating normality. Only arsenic and selenium remained  
235 substantially non-normally distributed (best W statistic of Shapiro test  $< 0.75$ , Figure S5).

236 We tested for differences between uninoculated plants and plants inoculated with biota.  
237 We used linear models (MCMCglmm, in R) for each element or trait. Because there were  
238 many elements and traits, we used linear discriminant analysis to explore multivariate dif-  
239 ferences with inoculation (LDA, package MASS in R, Venables and Ripley, 2002).

240 We used canonical correlation analysis (with package CCA in R, González et al., 2008) to  
241 find the axes of greatest multivariate covariation between traits and elemental profiles, which  
242 we interpret as the traits that most likely depend on nutrient provisioning by biota. As our  
243 experiment was conducted at low phosphorus, we also explore phosphorus concentrations  
244 in particular. Plants may highly mis-express traits under artificial deprivation of soil biota  
245 (Partida-Martinez and Heil, 2011; Hubbard et al., 2019; O'Brien, 2019), so we restricted  
246 this analysis to inoculated plants, though we projected uninoculated plants onto resulting  
247 CCA axes for comparison. We evaluated links between composite axes and fitness using  
248 linear models ( $fitness \sim axis$ ), fit with MCMCglmm in R. To compare to results for local  
249 adaptation, we performed the same linear model analysis as for biomass (above) on the first  
250 two CCA axes and the traits most strongly correlated to them (strongest loadings), as well as  
251 leaf tissue phosphorus, due to expected links to a key rhizosphere component (AMF, Smith  
252 et al., 2010). To contrast these results with multivariate axes of traits and elemental profiles  
253 that may not be linked to each other (or to fitness, see Figure S12), we further extended  
254 the analysis to the previously described LDA axes, and the first axes of separate principal  
255 components analysis for traits and elemental profiles (see Table S4).



256 **Testing whether biota provide greater benefits at stressful sites and retain effects**  
257 **on traits and elements**

258 Because predictions of COCO rest on increasing benefits of biota at stressful sites, and  
259 some adaptive benefits may be conditional on local environments, we evaluated relationships  
260 between environment, elemental profiles, size traits, and rhizosphere colonization at field  
261 sites. We focused on one important rhizosphere component: arbuscular mycorrhizal fungi  
262 (AMF, Smith and Read, 2008).

263 During August 2013 collections, we quantified differences in field teosinte plants across  
264 the sites. We measured 20 plants per population (spanning the spatial extent) for height to  
265 the highest ligule, and stem width at the first node visible above the soil (only these traits  
266 could be measured in the field). We sampled the penultimate leaf (to avoid leaves still ex-  
267 panding), stored in paper envelopes, and included these in ICP-MS analyses described above.  
268 We also took a sample of mixed roots from throughout the upper 15 cm of the root system,  
269 transported from the field in 8 mL tubes of 10 % KOH, which we scored for AMF arbus-  
270 cules using standard methods (McGonigle et al., 1990), modified with less toxic alternatives.  
271 Briefly, we left roots in their field KOH solutions to clear (5-10 days), placed subsamples in  
272 histology cassettes, rinsed with deionized water, acidified in acetic acid (5%) for 2-3 hours,  
273 boiled in 5% acetic acid and 5% pen-ink (Parker, Quink Black-Blue Waterproof) for 3-5  
274 minutes (until roots take up the ink), and rinsed once with deionized water. We mounted  
275 stained roots on slides in corn syrup (Karo brand), and scored approximately 60 intersections  
276 for arbuscules with brightfield illumination microscopy (Vierheilig et al., 2005).

277 We projected field elemental profiles onto significant CCA axes we calculated from green-  
278 house data above. We selected the best performing environmental variable (present in the  
279 most best models,  $\beta_E$ ) from the greenhouse data to use in the field models, and we tested if  
280 projected field elemental profiles, field tissue phosphorus, or field-measured traits, suggested  
281 that effects of AMF ( $\beta_C$ ) increase at more stressful sites ( $\beta_{E \times C}$ ):

$$Y \sim \alpha + \beta_E E + \beta_C C + \beta_{E \times C} E \times C + \varepsilon \quad (2)$$

282 We fit the full model first and removed non-significant terms one at a time (as above,  
283 analogous analysis for LDA and PCA in Table S5).

## Results

### Only the COCO prediction of increased local benefits for plants and biota from stressful sites is supported

For biomass (our fitness proxy), we found that the best fitting plant and biota source variable was mean annual temperature (MAT, see also Figure S6). COCO predicted that biota from stressful cold sites should be the most generally mutualistic. Contrary to these predictions, overall, association with biota from warmer, less stressful sites increased plant biomass in the greenhouse (Figure 1,  $\beta_{EB}$ , Table 1). However, sympatric combinations of plants and biota produced greater plant biomass than expected from the effects of plant source and biota source on biomass ( $\beta_S$ , Table 1), suggesting benefits from local adaptation. In line with COCO predictions for local mutualistic adaptation, benefits of local adaptation were stronger for plants from colder sites: the interaction effect between MAT and sympatry ( $\beta_{E \times S}$ ) eroded the effect of sympatry (Table 1), reflecting that teosinte from colder sites paired with sympatric biota more strongly exceeded expectations for biomass when excluding sympatric terms (Figure 1, right).

### Inoculation increases phosphorus, biomass and affects elemental profiles, traits

Inoculation with biota had the expected effects of increasing biomass and tissue phosphorus relative to levels in uninoculated siblings. Inoculated plants were over 30% larger (average 3.50 and 2.59 grams total biomass,  $\pm 0.04$  and  $0.09$  SE, pMCMC  $< 0.05$ , see Table S3). Tissue concentrations of phosphorus were nearly double in inoculated plants ( $977 \mu\text{g g}^{-1}$  versus  $569 \mu\text{g g}^{-1}$ , standard error 11.8 and 12.1, respectively), but were still below levels for ideal plant growth ( $3000 \mu\text{g g}^{-1}$  Marschner, 2011, Figure S13). Beyond phosphorus, some greenhouse plants (and field plants) had concentrations in their tissues potentially signalling deficiency (magnesium and molybdenum) or toxicity (sodium, Figure S13, Marschner, 2011).

Our multivariate LDA distinguished the elemental profiles of inoculated plants from those in the sterilized treatment (successful assignment 95% overall) primarily based on tissue phosphorus (Figure S7). LDA of trait data poorly distinguished plants growing with live biota from uninoculated plants (predicted only 5% of uninoculated plants) but plants in live biota had wider stems ( $6.2$  and  $5.5$  mm,  $\pm 0.07$  and  $0.13$  SE) and grew earlier (Figure S8, and Table S3, both differences pMCMC  $< 0.05$ ). Most plant traits and element concentrations had significant correlations across inoculated and uninoculated siblings, indicating contributions from maternal environments, non-plastic genetic differences among families or populations, or similar (Table S3).

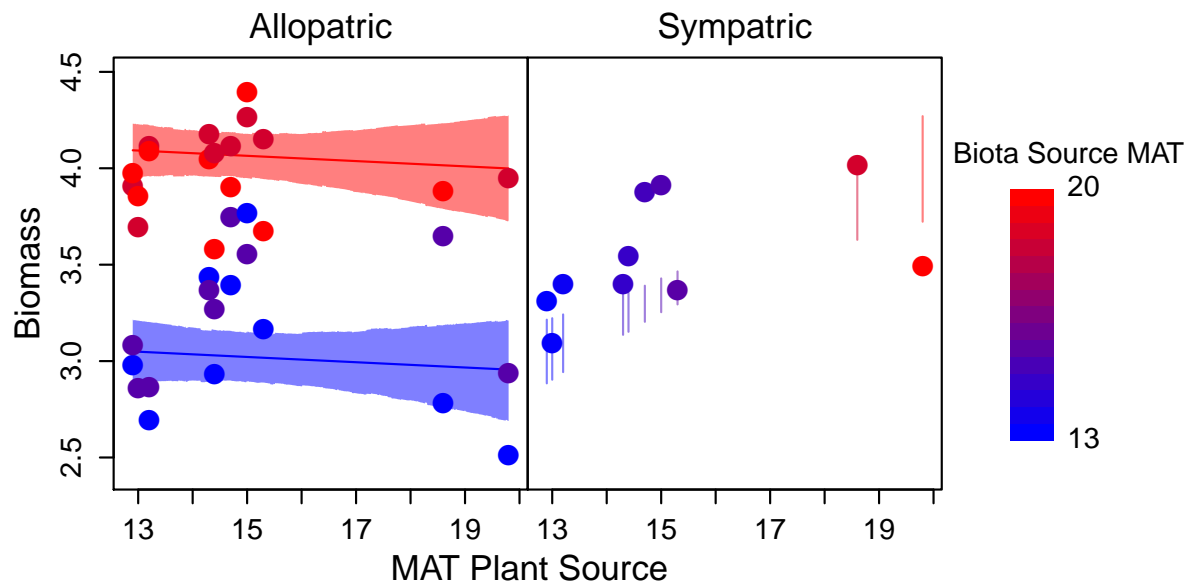

Figure 1: Mean biomass for each combination of plant and rhizosphere biota sources (points) plotted against the mean annual temperature (MAT °C) of the plant source site. Left panel: allopatric combinations show greater generalized mutualistic benefits from biota from warmer sites; non-overlapping model expectations (lines, 95% HPDI for the mean in shaded intervals) between plants grown with biota from the warmest (red) or coldest (blue) sites (effect of plant source MAT n.s.). Right panel: sympatric combinations (means, points) of teosinte and biota from colder sites show greater local, sympatric benefits (fall above vertical lines: 95% HPDI model expectations for these points excluding sympatric effects,  $\beta_S$  and  $\beta_{E \times S}$ ). Point color indicates MAT at the source site of the inoculated biota for both panels (redder = warmer).

## 317 **Co-varying axes of elemental profiles and traits link to fitness**

318 Because we expected plant nutrition and plant traits to be causally linked, we employed  
319 canonical correlation analysis (CCA) to identify the strongest axes of covariation between  
320 them. The first two axes explained significant covariation between traits and elements (34%  
321 and 26%, chi-squared  $p < 0.01$  and  $0.05$ , respectively, Figure 2a-b,e), and explained mod-  
322 erate portions of variance within traits (9% and 15%) and tissue elements (10% and 6%,  
323 respectively). For ease of interpretation, we flipped loading signs on the first CCA axis; this  
324 does not change results.

325 CCA axes identify highly multivariate relationships that may not be easily simplified  
326 into components, however, we identified several patterns. Briefly, on the first CCA axis,  
327 for a given concentration of rubidium, plants that had decreased tissue concentrations of  
328 molybdenum, cobalt, magnesium, potassium, and the majority of other elements were taller  
329 and also germinated earlier (Figure 2e, see Figure S9 for partial axis visualization). This axis  
330 may relate to potassium nutrition, as it is orthogonal to the well-known positive correlation  
331 between potassium and rubidium (Läuchli and Epstein, 1970, Figure S9). On the second  
332 axis, plants with elevated boron, sodium, and cobalt were linked to plants that germinated  
333 later but had wider stems, longer leaves and earlier timing of maximum growth rate (negative  
334 values for growth timing, Figure 2, see Figure S9 for partial axis visualization). Projected  
335 scores for uninoculated plants were lower than inoculated plants on the first and second axes  
336 (Figure S10, i.e. because they were smaller and had higher tissue concentrations of most  
337 elements excepting phosphorus, Figure S7, Table S3).

338 We expected that traits and elemental profiles would link to fitness. In the greenhouse,  
339 biomass was strongly correlated to CCA axes of elements and traits, as would be expected if  
340 relationships were causal or had underlying shared causes (Figures 2c-d,S12,  $\rho > 0.5$  for CCA  
341 axis 1). Instead, for multivariate analyses agnostic to trait links, trait and element axes are  
342 not correlated to each other (Figure S11). Correlations to biomass were generally weaker or  
343 even anti-predictive for these axes and phosphorus (Figure S12). For example, while both  
344 phosphorus and biomass increased with inoculation, phosphorus was negatively correlated  
345 to biomass among inoculated plants ( $\rho -0.21$ ).

## 346 **Local adaptation and source of plants, biota co-affect traits and elemental profiles**

347 Using linear models, we tested whether plant tissue phosphorus and linked axes of traits  
348 and elemental profiles differed across the environment of plant and biota sources. As seen  
349 for biomass, mean annual temperature (MAT) was the best fitting plant and biota source  
350 variable for these response variables (Table 1, see Table S4 for element score best models).

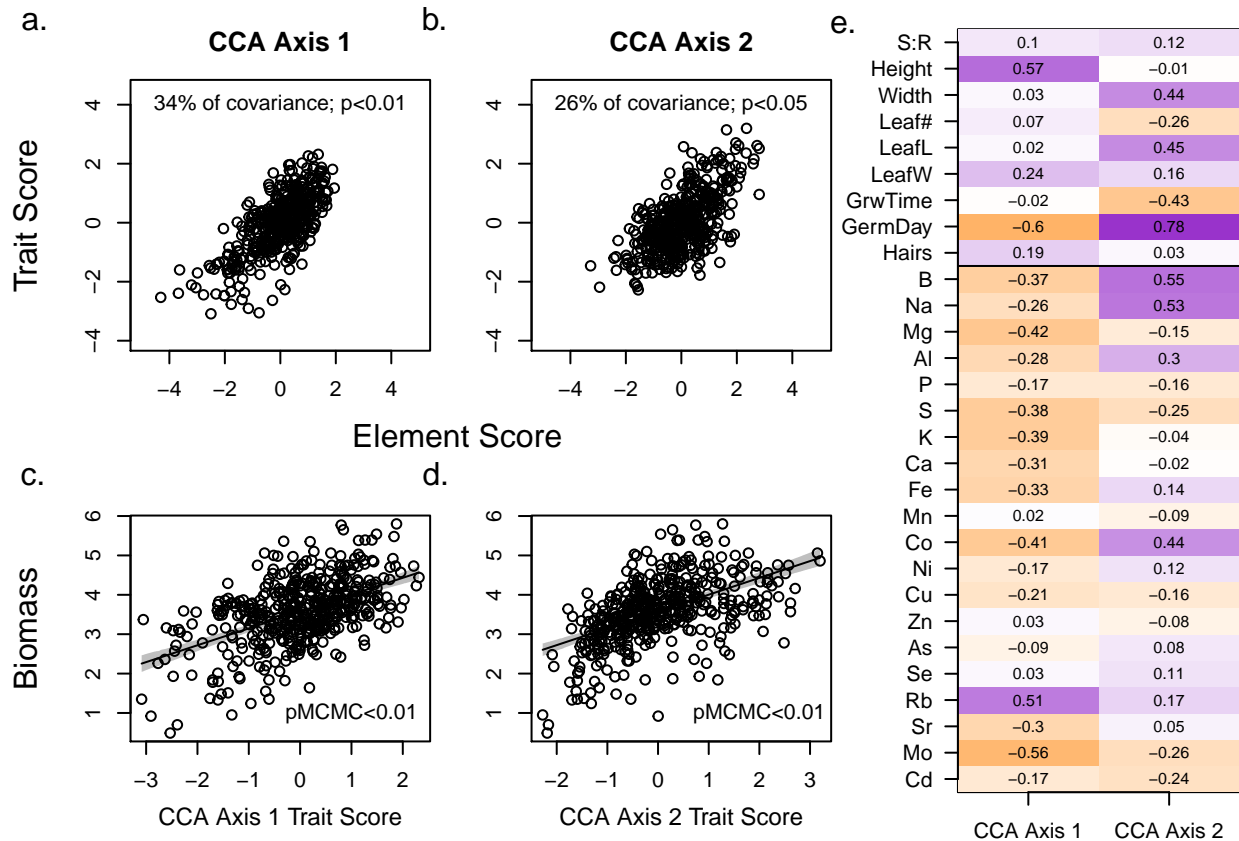

Figure 2: Two significant (as in Tabachnick et al., 2007) multivariate axes of covariation between traits and elements in greenhouse plants were identified by CCA, depicted by plotting trait and element scores for each axis (a and b, axis 1 and 2, respectively). Both multivariate axes were strongly positively correlated to biomass, for trait (c and d, for axis 1 and 2, respectively) and element scores (not shown, both  $pMCMC < 0.01$ ). (e) shows full multivariate correlations (equivalently, “loadings”) of trait (top) and elements (bottom) on CCA axes. Stronger positive correlations are in darker purple, stronger negative correlations in darker orange. Standard abbreviations for elements, GermDay = natural log of day of germination, lnHair = natural log of stem hairs per  $cm^2$ , S:R = shoot:root ratio, Width = stem width, LeafL = leaf length, LeafW = leaf width, GrwTime = higher values indicate a delay in peak growth rate. See Figure S9.

|                    | <i>parameter</i>     | biomass | ln(phosphorus) | CC1 Trait | CC2 Trait |
|--------------------|----------------------|---------|----------------|-----------|-----------|
| Intercept          | $a$                  | 1.27**  | 7.13**         | 0.92.     | -3.97**   |
| Biota source Env.  | $\beta_{EB}$         | 0.15**  | –              | 0.16**    | 0.11**    |
| Plant source Env.  | $\beta_{EP}$         | -0.014  | -0.017*        | -0.24**   | 0.15**    |
| Sympatry           | $\beta_S$            | 1.32*   | -0.44*         | 1.68**    | 1.53*     |
| Sympatry×Env.      | $\beta_{E \times S}$ | -0.077* | 0.025*         | -0.10**   | -0.096*   |
| Env. in best model |                      | MAT     | MAT            | MAT       | MAT       |

Table 1: Biota and plant source effects estimated by best models for plant fitness (biomass), plant tissue phosphorus, and trait scores on first and second CCA axes.<sup>1</sup>

351 We found mixed effects of locally matched plants and biota on tissue phosphorus and co-  
352 varying traits and elements. Plants from colder sites had more tissue phosphorus, but the  
353 only difference across biota was that teosinte from colder sites growing with sympatric biota  
354 had relatively lower tissue phosphorus (Figure 3a, Table 1), both trends likely reflecting  
355 elevated tissue phosphorus of smaller inoculated plants (see above). Plants sourced from  
356 colder sites had increased values on the first CCA axis for both traits and elemental profiles  
357 (Figure 3b, taller plants that also germinate early, and have high tissue rubidium relative  
358 to molybdenum, potassium, and most other elements), but plants growing in biota sourced  
359 from colder sites had decreased values for both traits and elemental profiles on the first CCA  
360 axis (shorter plants that also had later germination and opposite elemental profile shifts, see  
361 also Figure S9). Sympatric biota moved scores on the axis in the same direction as biota  
362 from warmer environments (positive sign of  $\beta_{EB}$  matches  $\beta_S$  Tables 1, S4), and, as seen for  
363 biomass, the strength of the sympatric effect decayed for plants and biota from warmer sites  
364 (negative  $\beta_{E \times S}$ , Tables 1, S4).

365 While plant source MAT and biota source MAT had opposite effects on the first CCA axis,  
366 they had aligned effects on the second ( $\beta_{EB}$  &  $\beta_{EP} > 0$ , Figure 3c). This signals that plants  
367 from warmer sites and plants growing with biota from warmer sites had later germination  
368 combined with earlier growth, and wider (but not taller) stems, as well as relatively higher  
369 concentrations of elements that load positively on CCA axis 2 (boron, sodium, and cobalt,  
370 see Figure S9). Sympatric biota shifted trait scores in the same direction as plants and  
371 biota from warmer environments, but sympatric effects decayed for plants from warmer  
372 environments ( $\beta_S > 0$ ,  $\beta_{E \times S} < 0$ , Table 1, Figure 3c, element score best model differs, Table  
373 S4). Similar results between the best models for CCA axes and best model for biomass  
374 reflect positive correlations between both CCA axes and biomass in the greenhouse (Figure  
375 2, Figure S12).

<sup>1</sup>Significance of intercepts are not meaningful (representing 0 °C MAT). –: not included in best model  
\*\*: pMCMC < 0.01, \*: pMCMC < 0.05, . : pMCMC < 0.1



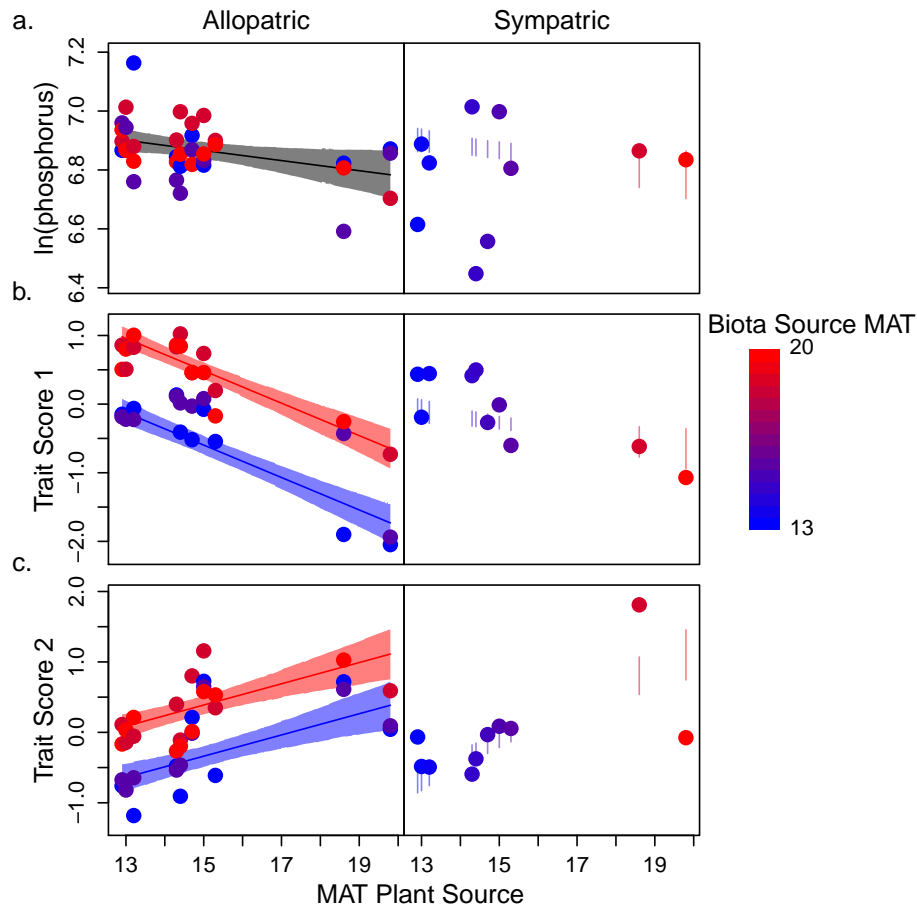

Figure 3: Mean tissue phosphorus (a, natural log) and CCA axis trait scores (b, c) for each combination of plant and biota sources (points) plotted against the mean annual temperature (MAT °C) of the plant source site. Point color indicates MAT at rhizosphere biota source site (redder = warmer). Left panels: observations and model expectations for allopatric treatments (lines, mean; shaded region 95% HPDI), separating predictions for plants grown with biota from the warmest (red) or coldest (blue) sites (except for phosphorus;  $\beta_{EB}$  is n.s). Right panels: observations for sympatric combinations. Vertical lines give 95% HPDI for model expectations for means omitting sympatric effects, as in Figure 1. Observed means outside this interval suggest local adaptation. See Table 1.

## 376 Field data suggest increased benefits of biota in cold sites

377 COCO predictions rest on increased benefits of biota to plants at stressful sites. Both  
 378 height and stem width increased with colonization at colder sites, but weakly decreased with  
 379 colonization at warmer sites (interaction pMCMC < 0.01, Table 2, Figure 4b,d). This is  
 380 consistent with greater benefits of biota at colder sites, and with positive effects of sympatric  
 381 biota for plants from colder field sites (in the field, all plants associate with sympatric biota).

382 In field plants, the projections onto the first CCA axis are negatively correlated to mean  
 383 annual temperature, concordant with plant source effects observed in the greenhouse (less  
 384 concentrated elements, taller plants at colder sites, slope pMCMC < 0.01, Tables 1, 2, S5,  
 385 Figures 3b, 4a,c), and therefore opposite to biota source effects observed in the greenhouse.  
 386 However, field plants from colder sites are only taller when colonized by mycorrhizal fungi  
 387 (Figure 4b, Table 2). Field plant scores on both this axis and the LDA for elemental profiles  
 388 may reflect greater biotic inoculation: field plants are shifted away from uninoculated plant  
 389 scores in the greenhouse, in the same direction as, and exceeding inoculated greenhouse plants  
 390 (Figures S7, S10; Table 2). Compared to greenhouse plants, field plants had lower tissue  
 391 concentrations of more than half of the elements, but higher concentrations of rubidium,  
 392 Figure S13), and were indeed taller: average height was  $80 \pm 4.5$  and  $35 \pm 0.4$  cm in the field  
 393 and greenhouse respectively (means  $\pm$  SE, pMCMC < 0.01).

|                          | Intercept | $\beta_{MAT}$ | $\beta_C$ | $\beta_{MAT \times C}$ |
|--------------------------|-----------|---------------|-----------|------------------------|
| <b>CC1 Element-score</b> | 2.65**    | -0.13**       | –         | –                      |
| <b>ln(phosphorus)</b>    | -6.96**   | 0.067**       | –         | –                      |
| <b>Height</b>            | -27.0     | 5.10          | 710.6**   | -40.9**                |
| <b>CC2 Element-score</b> | -4.28*    | -0.33**       | -8.87.    | 0.70*                  |
| <b>Stem width</b>        | 1.78      | 0.052         | 63.4**    | -0.38*                 |

Table 2: Best models for the projected element scores of the field plants onto the CCA axes calculated from greenhouse plants.<sup>2</sup>

394 On the second CCA axis (associated with phenology and weakly with wider stems),  
 395 projections for field plants again depended on AMF colonization. More colonized plants  
 396 were higher on this axis, in the direction of the main sympatric biota greenhouse effect, but  
 397 patterns across sites were inconsistent with greenhouse patterns. While we were not able to  
 398 measure phenology in the field, stem width patterns partially match changes in the axis: like  
 399 greenhouse plants from colder sites, field plants from colder sites indeed had wider stems,  
 400 especially with AMF colonization (Figure 4d, Table 2), but field plants have much wider

<sup>2</sup> $\beta_{MAT}$  is substituted for  $\beta_E$ , as MAT was the only variable tested for field data (see Methods). Significance of intercepts is not meaningful, representing 0°C. –: not in best model, \*\*: pMCMC < 0.01, \*: pMCMC < 0.05, .: pMCMC < 0.1.

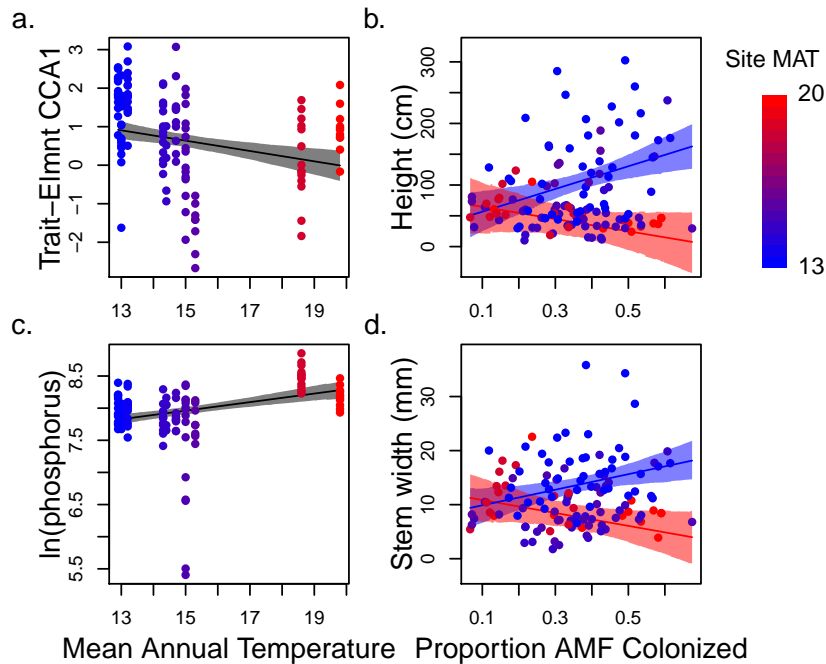

Figure 4: Field plant projected element scores on CCA axis 1 (a), tissue phosphorus (c, natural log of  $\mu\text{g g}^{-1}$  dry weight), and measured traits (b, d), plotted against either site mean annual temperature (MAT $^{\circ}\text{C}$ , a & c) or proportion of field roots colonized by AMF (b, d) when AMF effects were in best models. Color indicates MAT of the site (redder = warmer). Predictions (lines) and 95% HPDI intervals (shading) are shown for the mean across MAT of the sites in gray (a, c), or for the mean across the proportion of root length colonized by AMF, split into expectations for the warmest and coldest sites (red and blue, respectively) for height (b), and stem width (d).

401 stems than inoculated greenhouse plants ( $11\pm 0.43$  and  $6.1\pm 0.06$  mm, respectively, pMCMC  
402  $< 0.01$ ) despite equivalent scores on this axis (pMCMC  $> 0.05$ , Figure S10).

403 While the CCA axes showed strongly or marginally similar trends in the field, trends  
404 for PCA projections (agnostic to trait-element links) did not show any pattern across field  
405 sites, despite variation in greenhouse plant PCA scores across source sites (Tables S5,S4),  
406 suggesting that the linked trait-element CCA axes are better, though imperfect, predictors  
407 of field patterns.

## 408 Discussion

409 Abiotic environments play a consistent role in structuring local adaptation in plants and other  
410 species, but local adaptation to biotic environments may be highly variable (Briscoe Runquist  
411 et al., 2020; Hargreaves et al., 2020). Rampant shifts in the outcomes of species interactions  
412 across environmental conditions (Bronstein, 1994; Bertness and Callaway, 1994; Chamber-

413 lain et al., 2014; He and Bertness, 2014) perhaps underlie this variable strength of local  
414 adaptation (e.g. Thompson, 2005; Bronstein, 2009; O'Brien et al., 2018). Like most species  
415 interactions, plant interactions with rhizosphere biota vary substantially in both outcomes  
416 (Berg and Smalla, 2009; Smith and Read, 2008; Anacker et al., 2014) and degree of local  
417 adaptation (Rúa et al., 2016). Further, plant traits are influenced by rhizosphere microbes  
418 that they associate with (Friesen et al., 2011), especially through changes to plant nutrition  
419 (Desbrosses and Stougaard, 2011; Paszkowski and Gutjahr, 2013; Lu et al., 2018), suggest-  
420 ing that adaptive changes in plant-microbiome interactions may alter the concentrations of  
421 elements in plant tissues. We investigated the influence of rhizosphere biota on plant fitness,  
422 trait expression, and elemental profiles in teosinte within the context of correlated environ-  
423 mental gradients of both climate and soil fertility. We found that changes in fitness (via a  
424 proxy of biomass) and traits were linked to changes in elemental profiles and were affected  
425 by the source of the rhizosphere biota and the plant population it was paired with.

#### 426 **Local adaptation is strengthened in cold sites**

427 Plants from colder sites derived greater specific benefits from their local biota, matching  
428 one of our predictions based on COCO (O'Brien et al., 2018): increased local adaptation  
429 between plants and biota from colder sites, which we presume are more stressful (Figure  
430 1, using biomass as a proxy for fitness, see Methods). However, biota from colder sites  
431 produced less fit plants, in contrast to our other prediction: that biota from stressful sites  
432 would provide greater generalized benefits across plants. This prediction of COCO relies on  
433 at least some benefits provided by biota to plants being independent of plant genotype and  
434 environment, i.e. if some microbes always provide more phosphorus than others, this would  
435 likely be beneficial across all hosts and environments. However, our results are consistent  
436 with most benefits of rhizosphere biota being either host-plant- or environment-dependent:  
437 i.e. there may be little variation in benefits from rhizosphere biota that is not context  
438 dependent, and thus limited potential for the evolution of generalized benefits.

439 Recent experimental work has suggested that more benefits from plant-microbe inter-  
440 actions may derive from local adaptation and genotype-dependent effects than previously  
441 thought (Batstone et al., 2020; Ramírez-Flores et al., 2020). Other studies have also sug-  
442 gested that benefits provided by biota to plants are greatest when experimental conditions  
443 match the environment to which the biota are adapted (Johnson et al., 2010; Lau and  
444 Lennon, 2012), and mean greenhouse temperature during our experiment was closer to mean  
445 annual temperature of our warmest sites (Table S1, Methods). This prevalence of host- and  
446 environment- dependent effects suggests that efforts to leverage and manipulate organisms  
447 in the plant rhizosphere for increased resilience to abiotic stress in agricultural crops (e.g.

448 Bouwmeester et al., 2019), must tailor solutions to specific sites and cultivars.

449 Indeed, the existence of environment-dependent benefits is an assumption of COCO to  
450 begin with. Given that we expect benefits of rhizosphere biota to increase in cold, drought,  
451 and infertile conditions, the benefits we observed in the greenhouse may have been under-  
452 estimates, especially at cold sites. We used field-measured traits and links between traits,  
453 elements, and fitness in the greenhouse as a window into benefits of rhizosphere biota in the  
454 field. In the field, multivariate patterns across sites for elemental profiles and traits matched  
455 only patterns across plant source sites and sympatric effects observed in the greenhouse.  
456 Both field and greenhouse plants from colder sites, especially those paired with sympatric  
457 biota (greenhouse) or more colonized by AMF (field), were taller and higher on CCA axis 1  
458 (Figures 3b, 4a). We observed opposite relationships between teosinte size and mycorrhizal  
459 colonization between warmer (slope weakly negative) and colder (slope strongly positive)  
460 field sites (Figure 4b,d, stem width and height), consistent with increased benefits of biota  
461 at cold sites, with previous work showing that maize benefits from mycorrhizae increase in  
462 the cold (Zhu et al., 2009), and with increased benefits of these biota in sympatric contexts  
463 as observed in the greenhouse. Patterns in the field are thus consistent with greater benefits  
464 of biota from and at cold sites.

### 465 **Plants and biota have both opposing and aligned effects on traits across envi-** 466 **ronmental gradients**

467 Mechanistically, local adaptation to abiotic environments or biotic interactions must ulti-  
468 mately be based on genetic differences in the expression of traits, yet biotic interactions  
469 themselves can alter the expression of traits. For example, microbiomes shape traits from  
470 obesity to life history in their animal hosts (Turnbaugh et al., 2008; Gould et al., 2018),  
471 and plant-microbiomes shape a comprehensive range of vegetative and floral traits in plants  
472 (Friesen et al., 2011; Rebolleda-Gómez et al., 2019). If one species' influence on another  
473 species' phenotype feeds back to affect its own fitness, selection will shape any genetic varia-  
474 tion in the first species affecting traits in the second (so-called 'extended' phenotypes Dawkins  
475 et al., 1982; Rebolleda-Gómez et al., 2019; O'Brien et al., 2021). Indeed, reciprocal feed-  
476 backs of traits on the fitness of interacting species is a condition of co-evolution and likely  
477 to be common (Thompson, 2005). Perhaps unsurprisingly, a growing number of examples  
478 document evolving extended phenotypes (Lau and Lennon, 2012; Panke-Buisse et al., 2015;  
479 Rudman et al., 2019) with the implication that extended phenotypes could contribute sub-  
480 stantially to local adaptation or local co-adaptation between interacting species.

481 Here, we observed that the effects of biota and plant source on plant fitness, elemental  
482 profiles, and phenotypes sometimes opposed, and sometimes matched each other. Plants

483 from cold sites were relatively taller with earlier germination, and tissue concentrations of  
484 most elements that were low relative to rubidium levels, but biota from cold sites produced  
485 relatively shorter and later-germinating plants that had opposite shifts in elemental profiles  
486 (Figures 2,3b, Figure S9). However, the second major axis of trait co-variation instead shows  
487 similar, or reinforcing effects of plants and rhizosphere biota from the same site. Opposing  
488 or correlated impacts on trait values between hosts and microbes have been theoretically  
489 linked to the evolution of extended phenotypes under conflicting or identical trait optima,  
490 respectively (O'Brien et al., 2021), suggesting that plants and microbes may have different  
491 fitness optima across sites for traits on the first CCA axis, but similar optima for traits on  
492 the second axis.

### 493 **Potential mechanisms of links between elemental profiles and traits**

494 We observed that variation in fitness (biomass) was shaped by the influence of biota and  
495 climate on linked, multivariate axes of plant phenotypes and elemental profiles (CCA, Figures  
496 1-3). These linked axes primarily included connections between elements and size (height,  
497 stem width) or elements and phenology (germination, timing of peak growth).

498 Phenology is an important trait for ecological adaptation in both maize and teosinte, with  
499 colder high elevation populations flowering earlier and having less seed dormancy (Rodríguez  
500 et al., 2006; López et al., 2011; Navarro et al., 2017). Elemental profiles can signal physio-  
501 logical variation (Baxter et al., 2008), but we cannot ascribe causality to particular elements  
502 here. However, several elements and traits that load heavily onto the CCA axes match  
503 with known links between phenology and nutrition, and may be worth further investigation.  
504 Delays in germination in teosinte from, or growing with biota from, warmer sites were associ-  
505 ated with multivariate shifts in elements loading strongly onto CCA axes 1 (higher rubidium  
506 relative to the concentrations molybdenum and most other elements) and 2 (including si-  
507 multaneously increased sodium and boron, Figures 2,3b-c,S9). Only sodium was at levels  
508 expected to be limiting (Figure S13, Maron et al., 2014). Sodium toxicity has been previously  
509 linked to inhibited germination in maize, and maize tolerance to sodium can be impacted by  
510 rhizosphere biota (Farooq et al., 2015). Likewise, multivariate increases in elements loading  
511 positively onto CCA axis 2 (primarily boron and sodium) was associated with plants from,  
512 or growing with biota from, warmer sites that had an earlier burst of growth (Figures 1, 3c,  
513 S9). Boron is required in large amounts by reproductive tissues of maize (Lordkaew et al.,  
514 2011; Marschner, 2011), and precocious flowering can be favored by sodium stress (Farooq  
515 et al., 2015), suggesting possible links between sodium, boron, growth timing and flowering  
516 in teosinte. In the field, teosinte plants in warmer sites complete flowering earlier (Table S2),  
517 and a boron transporter was implicated in adaptation to different climatic environments in



518 teosinte (Pyhäjärvi et al., 2013).

519 We expected mycorrhizal fungi to drive some linked changes in elemental profiles and size  
520 traits, as phosphorus deficiency in our experiment should have enhanced both their coloniza-  
521 tion of teosinte roots and benefits from phosphorus provided (Smith et al., 2010). Indeed  
522 phosphorus and rubidium (which can also indicate increased AMF colonization, Hawkes  
523 and Casper, 2002) increased significantly from uninoculated to inoculated plants (Table S3).  
524 However, phosphorus patterns in the field (Figure 4c) do not match with spore counts or  
525 colonization rates (Table S2, Figures 4b,d, S13), and other changes in our leaf elemental  
526 profiles only partially reflect changes observed in maize profiles following inoculation with  
527 mycorrhizal fungi (Kothari et al., 1990; Ramírez-Flores et al., 2017). Trade-offs that we  
528 observed between small plants with more concentrated elements versus plants that grow  
529 larger despite low, or even deficient concentrations of elements (CCA axis 1, Figures 1, S9,  
530 S13) could instead be driven by other microbes: a wide array of root-associated bacteria can  
531 synthesize, metabolize or interfere with plant hormones (Duca et al., 2014; Gamalero and  
532 Glick, 2015) and many soil bacteria alter plant-available nitrogen or phosphorus (Bulgarelli  
533 et al., 2013). Indeed, the rhizosphere biota we manipulated here certainly include microbes  
534 beyond mycorrhizal fungi.

## 535 **Conclusions**

536 Our results highlight the co-influence of abiotic and biotic factors on plant phenotypes. We  
537 observed that environment patterned the extent of local adaptation between plants and  
538 rhizosphere biota, and the effects of plant-biota interactions on phenotypes. Going a step  
539 further, we also know that rhizosphere community composition and function commonly shift  
540 across climatic gradients (Veen et al., 2017; Van Nuland et al., 2017; Praeg et al., 2019;  
541 Karray et al., 2020; Vieira et al., 2020). As species colonize new habitats in response to  
542 global change, the turnover from locally adapted to novel species interactions may drive  
543 unexpected phenotypic changes and have implications for successful range shifts.

## 544 **Acknowledgements**

545 We would like to thank members of the Eguiarte laboratory for help with collections in  
546 the field, María Rocio Martínez Villalpando, Carlos Fabián de la Cruz, Abenamar Gordillo  
547 Hidalgo, Dario Alavez & Arturo Chávez for greenhouse help. The project was supported  
548 by UC MEXUS, the UC Davis Center for Population Biology, GSR fellowship from the  
549 UC Davis Department of Plant Sciences, and NSF GRFP DGE-1148897 funding to AMO;  
550 USDA Hatch project CA-D-PLS-2066-H and NSF grant IOS-0922703 to JRI; and NSF grant

551 DEB-0919559 to SYS. LEE and JGP work was funded by grants CB2011/167826 (CONA-  
552 CYT Investigación Científica Básica), M12/A03 ECOS Nord France (CONACYT-ANUIES  
553 207571), and by institutional funding from the Institute of Ecology, Universidad Nacional  
554 Autónoma de México. Ionomics profiling and IB were supported by the United States De-  
555 partment of Agriculture-Agricultural Research Service. We would also like to thank Graham  
556 Coop and Joanna Schmitt for helpful discussions during experiment planning.

## 557 **Authorship Contributions**

558 All authors contributed substantially to the design of the study, provisioning of materials,  
559 and revising of the manuscript. AMO proposed the study together with JRI and SYS.  
560 AMO collected the data, performed analyses and provided the first draft of the manuscript.  
561 LEE logistically supported and advised the fieldwork, which was conducted by AMO and  
562 JGP. RJHS logistically supported and advised the greenhouse work, which was conducted  
563 by AMO. IB advised on sampling design for ionomics, and extracted ionomics data.

## 564 **Data availability**

565 All scripts and datafiles are on Github (<https://github.com/amob/A0-1>) and will be made  
566 public at the time of publication; data will additionally be made available on figshare.

## 567 **References**

- 568 Anacker, B. L., J. N. Klironomos, H. Maherali, K. O. Reinhart, and S. Y. Strauss. 2014.  
569 Phylogenetic conservatism in plant-soil feedback and its implications for plant abundance.  
570 Ecology Letters, **17**:1613–1621.
- 571 Bais, H. P., T. L. Weir, L. G. Perry, S. Gilroy, and J. M. Vivanco. 2006. The role of root  
572 exudates in rhizosphere interactions with plants and other organisms. Annual Review of  
573 Plant Biology, **57**:233–266.
- 574 Batstone, R. T., A. M. O'Brien, T. L. Harrison, and M. E. Frederickson. 2020. Experimen-  
575 tal evolution makes microbes more cooperative with their local host genotype. Science,  
576 **370**:476–478.
- 577 Baxter, I. R., O. Vitek, B. Lahner, B. Muthukumar, M. Borghi, J. Morrissey, M. L. Guerinot,  
578 and D. E. Salt. 2008. The leaf ionome as a multivariable system to detect a plant's  
579 physiological status. Proceedings of the National Academy of Sciences, **105**:12081–12086.

- 580 Berg, G. and K. Smalla. 2009. Plant species and soil type cooperatively shape the structure  
581 and function of microbial communities in the rhizosphere. *FEMS Microbiology Ecology*,  
582 **68**:1–13.
- 583 Bertness, M. D. and R. Callaway. 1994. Positive interactions in communities. *Trends in*  
584 *Ecology & Evolution*, **9**:191–193.
- 585 Bever, J. D. 2015. Preferential allocation, physio-evolutionary feedbacks, and the stability  
586 and environmental patterns of mutualism between plants and their root symbionts. *New*  
587 *Phytologist*, **205**:1503–1514.
- 588 Blanquart, F., O. Kaltz, S. L. Nuismer, and S. Gandon. 2013. A practical guide to measuring  
589 local adaptation. *Ecology Letters*, **16**:1195–1205.
- 590 Bloom, A., M. Zwieniecki, J. Passioura, L. Randall, N. Holbrook, and D. St Clair. 2004.  
591 Water relations under root chilling in a sensitive and tolerant tomato species. *Plant, Cell*  
592 *& Environment*, **27**:971–979.
- 593 Bouwmeester, H. J., M. Dicke, E. T. Kiers, C. M. J. Pieterse, J. M. Raaijmakers, and  
594 C. S. Testerink. 2019. MiCRop Consortium programme, Harnessing the second genome of  
595 plants. Microbial imprinting for crop resilience, Dutch Research Council (NWO/OCW),  
596 grant number 024.004.14. <https://www.microp.org/>.
- 597 Briscoe Runquist, R. D., A. J. Gorton, J. B. Yoder, N. J. Deacon, J. J. Grossman, S. Kothari,  
598 M. P. Lyons, S. N. Sheth, P. Tiffin, and D. A. Moeller. 2020. Context dependence of local  
599 adaptation to abiotic and biotic environments: a quantitative and qualitative synthesis.  
600 *The American Naturalist*, **195**:412–431.
- 601 Bronstein, J. L. 1994. Conditional outcomes in mutualistic interactions. *Trends in Ecology*  
602 *& Evolution*, **9**:214–217.
- 603 Bronstein, J. L. 2009. The evolution of facilitation and mutualism. *Journal of Ecology*,  
604 **97**:1160–1170.
- 605 Bulgarelli, D., K. Schlaeppi, S. Spaepen, E. V. L. van Themaat, and P. Schulze-Lefert. 2013.  
606 Structure and functions of the bacterial microbiota of plants. *Annual Review of Plant*  
607 *Biology*, **64**:807–838.
- 608 Callaway, R. M., R. W. Brooker, P. Choler, Z. Kikvidze, C. J. Lortie, R. Michalet, L. Paolini,  
609 F. I. Pugnaire, B. Newingham, E. T. Aschehoug, C. Armas, D. Kikodze, and B. J. Cook.  
610 2002. Positive interactions among alpine plants increase with stress. *Nature*, **417**:844–848.
- 611 Chamberlain, S. A., J. L. Bronstein, and J. A. Rudgers. 2014. How context dependent are  
612 species interactions? *Ecology Letters*, **17**:881–890.
- 613 Cushman, J. H. and T. G. Whitham. 1989. Conditional mutualism in a membracid-ant  
614 association: temporal, age-specific, and density-dependent effects. *Ecology*, **70**:1040–1047.
- 615 Dawkins, R. et al. 1982. *The extended phenotype*, volume 8. Oxford University Press Oxford.

- 616 Desbrosses, G. J. and J. Stougaard. 2011. Root nodulation: a paradigm for how plant-  
617 microbe symbiosis influences host developmental pathways. *Cell Host & Microbe*, **10**:348–  
618 358.
- 619 Duca, D., J. Lorv, C. L. Patten, D. Rose, and B. R. Glick. 2014. Indole-3-acetic acid in  
620 plant–microbe interactions. *Antonie Van Leeuwenhoek*, **106**:85–125.
- 621 Farooq, M., M. Hussain, A. Wakeel, and K. H. Siddique. 2015. Salt stress in maize: effects,  
622 resistance mechanisms, and management. A review. *Agronomy for Sustainable Develop-*  
623 *ment*, **35**:461–481.
- 624 Friesen, M. L., S. S. Porter, S. C. Stark, E. J. von Wettberg, J. L. Sachs, and E. Martinez-  
625 Romero. 2011. Microbially mediated plant functional traits. *Annual Review of Ecology,*  
626 *Evolution, and Systematics*, **42**:23–46.
- 627 Furlan, V., H. Bartschi, J.-A. Fortin, et al. 1980. Media for density gradient extraction of  
628 endomycorrhizal spores. *Transactions of the British Mycological Society*, **75**:336–338.
- 629 Fustier, M.-A., N. E. Martínez-Ainsworth, J. A. Aguirre-Liguori, A. Venon, H. Corti,  
630 A. Rousselet, F. Dumas, H. Dittberner, M. G. Camarena, D. Grimaneli, et al. 2019.  
631 Common gardens in teosintes reveal the establishment of a syndrome of adaptation to  
632 altitude. *PLoS genetics*, **15**:e1008512.
- 633 Gamalero, E. and B. R. Glick. 2015. Bacterial modulation of plant ethylene levels. *Plant*  
634 *physiology*, **169**:13–22.
- 635 González, I., S. Déjean, P. Martin, and A. Baccini. 2008. CCA: An R package to extend  
636 canonical correlation analysis. *Journal of Statistical Software*, **23**:1–14.
- 637 Gould, A. L., V. Zhang, L. Lamberti, E. W. Jones, B. Obadia, N. Korasidis, A. Gavryushkin,  
638 J. M. Carlson, N. Beerenwinkel, and W. B. Ludington. 2018. Microbiome interactions  
639 shape host fitness. *Proceedings of the National Academy of Sciences*, **115**:E11951–E11960.
- 640 Hadfield, J. D. 2010. MCMC methods for multi-response generalized linear mixed models:  
641 the MCMCglmm R package. *Journal of Statistical Software*, **33**:1–22. Version 2.22.1.
- 642 Hargreaves, A. L., R. M. Germain, M. Bontrager, J. Persi, and A. L. Angert. 2020. Lo-  
643 cal adaptation to biotic interactions: A meta-analysis across latitudes. *The American*  
644 *Naturalist*, **195**:395–411.
- 645 Hawkes, C. V. and B. B. Casper. 2002. Lateral root function and root overlap among  
646 mycorrhizal and nonmycorrhizal herbs in a florida shrubland, measured using rubidium as  
647 a nutrient analog. *American Journal of Botany*, **89**:1289–1294.
- 648 He, Q. and M. D. Bertness. 2014. Extreme stresses, niches, and positive species interactions  
649 along stress gradients. *Ecology*, **95**:1437–1443.
- 650 Hijmans, R. J. 2015. raster: Geographic data analysis and modeling. R package version  
651 2.3-24.

- 652 Hijmans, R. J., S. E. Cameron, J. L. Parra, P. G. Jones, and A. Jarvis. 2005. Very high  
653 resolution interpolated climate surfaces for global land areas. *International Journal of*  
654 *Climatology*, **25**:1965–1978.
- 655 Hiltner, L. 1904. Über neue erfahrungen und probleme auf dem gebeit der bodenbackteri-  
656 ologie und unter besonderer berucksichtigung der grundungung und brache. *Arb. Deut.*  
657 *Landwirsch Ges.*, **98**:5978.
- 658 Hubbard, C. J., B. Li, R. McMinn, M. T. Brock, L. Maignien, B. E. Ewers, D. Kliebenstein,  
659 and C. Weinig. 2019. The effect of rhizosphere microbes outweighs host plant genetics in  
660 reducing insect herbivory. *Molecular ecology*, **28**:1801–1811.
- 661 Hufford, M. B., P. Lubinsky, T. Pyhäjärvi, M. T. Devengenzo, N. C. Ellstrand, and J. Ross-  
662 Ibarra. 2013. The genomic signature of crop-wild introgression in maize. *PLoS Genetics*,  
663 **9**:e1003477.
- 664 Instituto Nacional de Estadística y Geografía. 2014. Perfiles de suelos, estados unidos mex-  
665 icanos. <http://www.inegi.org.mx/geo/contenidos/reclnat/edafologia/default.aspx>.
- 666 Johnson, N. C. 1993. Can fertilization of soil select less mutualistic mycorrhizae? *Ecological*  
667 *Applications*, **3**:749–757.
- 668 Johnson, N. C., G. W. T. Wilson, M. A. Bowker, J. A. Wilson, and R. M. Miller. 2010.  
669 Resource limitation is a driver of local adaptation in mycorrhizal symbioses. *Proceedings*  
670 *of the National Academy of Sciences*, **107**:2093–2098.
- 671 Karray, F., M. Gargouri, A. Chebaane, N. Mhiri, A. Mliki, and S. Sayadi. 2020. Climatic  
672 aridity gradient modulates the diversity of the rhizosphere and endosphere bacterial mi-  
673 crobiomes of *Opuntia ficus-indica*. *Frontiers in Microbiology*, **11**:1622.
- 674 Kaur, G., M. Dhillon, and B. Dhillon. 1985. Agronomic and anatomical characters in relation  
675 to cold-tolerance and grain-yield in a maize composite. *Proceedings of the Indian National*  
676 *Science Academy. Part B: Biological sciences*.
- 677 Kemp, J. E., D. M. Evans, W. J. Augustyn, and A. G. Ellis. 2017. Invariant antagonistic  
678 network structure despite high spatial and temporal turnover of interactions. *Ecography*,  
679 **40**:1315–1324.
- 680 Kivlin, S. N., S. M. Emery, and J. A. Rudgers. 2013. Fungal symbionts alter plant responses  
681 to global change. *American Journal of Botany*, **100**:1445–1457.
- 682 Kothari, S., H. Marschner, and V. Römheld. 1990. Direct and indirect effects of VA mycor-  
683 rhizal fungi and rhizosphere microorganisms on acquisition of mineral nutrients by maize  
684 (*Zea mays* L.) in a calcareous soil. *New Phytologist*, **116**:637–645.
- 685 Lau, J. A. and J. T. Lennon. 2012. Rapid responses of soil microorganisms improve plant fit-  
686 ness in novel environments. *Proceedings of the National Academy of Sciences*, **109**:14058–  
687 14062.

- 688 Läubli, A. and E. Epstein. 1970. Transport of potassium and rubidium in plant roots: the  
689 significance of calcium. *Plant Physiology*, **45**:639.
- 690 Lauter, N. 2004. The inheritance and evolution of leaf pigmentation and pubescence in  
691 teosinte. *Genetics*, **167**:1949–1959.
- 692 López, A. N. A., J. de Jesús Sánchez González, J. A. R. Corral, L. D. L. C. Larios,  
693 F. Santacruz-Ruvalcaba, C. V. S. Hernández, and J. B. Holland. 2011. Seed dormancy in  
694 mexican teosinte. *Crop Science*, **51**:2056.
- 695 Lordkaew, S., B. Dell, S. Jamjod, and B. Rerkasem. 2011. Boron deficiency in maize. *Plant  
696 and Soil*, **342**:207–220.
- 697 Lu, T., M. Ke, M. Lavoie, Y. Jin, X. Fan, Z. Zhang, Z. Fu, L. Sun, M. Gillings, J. Peñuelas,  
698 et al. 2018. Rhizosphere microorganisms can influence the timing of plant flowering.  
699 *Microbiome*, **6**:1–12.
- 700 Lundberg, D. S., S. L. Lebeis, S. H. Paredes, S. Yourstone, J. Gehring, S. Malfatti, J. Trem-  
701 blay, A. Engelbrektson, V. Kunin, T. G. del Rio, R. C. Edgar, T. Eickhorst, R. E. Ley,  
702 P. Hugenholtz, S. G. Tringe, and J. L. Dangl. 2012. Defining the core *Arabidopsis thaliana*  
703 root microbiome. *Nature*, **488**:86–90.
- 704 Maron, J. L., K. C. Baer, and A. L. Angert. 2014. Disentangling the drivers of context-  
705 dependent plant-animal interactions. *Journal of Ecology*, **102**:1485–1496.
- 706 Marschner, H. 2011. Marschner’s mineral nutrition of higher plants. Academic press.
- 707 McGonigle, T. P., M. H. Miller, D. G. Evans, G. L. Fairchild, and J. A. Swan. 1990. A new  
708 method which gives an objective measure of colonization of roots by vesicular-arbuscular  
709 mycorrhizal fungi. *New Phytologist*, **115**:495–501.
- 710 Navarro, J. A. R., M. Willcox, J. Burgueño, C. Romay, K. Swarts, S. Trachsel, E. Preciado,  
711 A. Terron, H. V. Delgado, V. Vidal, et al. 2017. A study of allelic diversity underlying  
712 flowering-time adaptation in maize landraces. *Nature Genetics*, **49**:476–480.
- 713 O’Brien, A. M. 2019. Importance of plant-and microbe-driven metabolic pathways for plant  
714 defence. *Molecular ecology*, **28**:1582–1584.
- 715 O’Brien, A. M., C. N. Jack, M. L. Friesen, and M. E. Frederickson. 2021. Whose trait  
716 is it anyways? Coevolution of joint phenotypes and genetic architecture in mutualisms.  
717 *Proceedings of the Royal Society B*, **288**:20202483.
- 718 O’Brien, A. M., R. J. Sawers, J. Ross-Ibarra, and S. Y. Strauss. 2018. Evolutionary responses  
719 to conditionality in species interactions across environmental gradients. *The American  
720 Naturalist*, **192**:715–730.
- 721 O’Brien, A. M., R. J. Sawers, S. Y. Strauss, and J. Ross-Ibarra. 2019. Adaptive phenotypic  
722 divergence in an annual grass differs across biotic contexts. *Evolution*, **73**:2230–2246.



- 723 Panke-Buisse, K., A. C. Poole, J. K. Goodrich, R. E. Ley, and J. Kao-Kniffin. 2015. Selection  
724 on soil microbiomes reveals reproducible impacts on plant function. *The ISME journal*,  
725 **9**:980.
- 726 Partida-Martinez, L. P. P. and M. Heil. 2011. The microbe-free plant: fact or artifact?  
727 *Frontiers in plant science*, **2**:100.
- 728 Paszkowski, U. and C. Gutjahr. 2013. Multiple control levels of root system remodeling in  
729 arbuscular mycorrhizal symbiosis. *Frontiers in plant science*, **4**:204.
- 730 Piperno, D. R., I. Holst, K. Winter, and O. McMillan. 2015. Teosinte before domestication:  
731 Experimental study of growth and phenotypic variability in late pleistocene and early  
732 holocene environments. *Quaternary International*, **363**:65–77.
- 733 Plummer, M., N. Best, K. Cowles, and K. Vines. 2006. CODA: Convergence diagnosis and  
734 output analysis for MCMC. *R News*, **6**:7–11.
- 735 Praeg, N., H. Pauli, and P. Illmer. 2019. Microbial diversity in bulk and rhizosphere soil of  
736 *Ranunculus glacialis* along a high-alpine altitudinal gradient. *Frontiers in microbiology*,  
737 **10**:1429.
- 738 Pyhäjärvi, T., M. B. Hufford, S. Mezouk, and J. Ross-Ibarra. 2013. Complex patterns of  
739 local adaptation in teosinte. *Genome Biology and Evolution*, **5**:1594–1609.
- 740 R Core Team. 2019. R: A Language and Environment for Statistical Computing. R Foun-  
741 dation for Statistical Computing, Vienna, Austria. Version 3.6.0.
- 742 Raaijmakers, J., T. Paulitz, C. Steinberg, C. Alabouvette, and Y. Moëgne-Loccoz. 2009.  
743 The rhizosphere: a playground and battlefield for soilborne pathogens and beneficial mi-  
744 croorganisms. *Plant and Soil*, **321**:341–361.
- 745 Ramírez-Flores, M. R., S. Perez-Limon, M. Li, B. Barrales-Gamez, D. Albinsky,  
746 U. Paszkowski, V. Olalde-Portugal, and R. J. Sawers. 2020. The genetic architecture  
747 of host response reveals the importance of arbuscular mycorrhizae to maize cultivation.  
748 *Elife*, **9**:e61701.
- 749 Ramírez-Flores, M. R., R. Rellan-Alvarez, B. Wozniak, M.-N. Gebreselassie, I. Jakobsen,  
750 V. Olalde-Portugal, I. Baxter, U. Paszkowski, and R. J. Sawers. 2017. Co-ordinated  
751 changes in the accumulation of metal ions in maize (*Zea mays ssp. mays* L.) in response  
752 to inoculation with the arbuscular mycorrhizal fungus *Funneliformis mosseae*. *Plant and*  
753 *Cell Physiology*, **58**:1689–1699.
- 754 Rebolleda-Gómez, M., N. J. Forrester, A. L. Russell, N. Wei, A. M. Fethers, J. D. Stephens,  
755 and T.-L. Ashman. 2019. Gazing into the anthosphere: considering how microbes influence  
756 floral evolution. *New Phytologist*, **224**:1012–1020.
- 757 Rodríguez, J., G. Sánchez, B. Baltazar, L. De la Cruz, F. Santacruz-Ruvalcaba, P. Ron, and  
758 J. Schoper. 2006. Characterization of floral morphology and synchrony among *Zea* species  
759 in Mexico. *Maydica* (Italy).

- 760 Rúa, M. A., A. Antoninka, P. M. Antunes, V. B. Chaudhary, C. Gehring, L. J. Lamit, B. J.  
761 Piculell, J. D. Bever, C. Zabinski, J. F. Meadow, M. J. Lajeunesse, B. G. Milligan, J. Karst,  
762 and J. D. Hoeksema. 2016. Home-field advantage? Evidence of local adaptation among  
763 plants, soil, and arbuscular mycorrhizal fungi through meta-analysis. *BMC Evolutionary*  
764 *Biology*, **16**.
- 765 Rudman, S. M., S. Greenblum, R. C. Hughes, S. Rajpurohit, O. Kiratli, D. B. Lowder, S. G.  
766 Lemmon, D. A. Petrov, J. M. Chaston, and P. Schmidt. 2019. Microbiome composition  
767 shapes rapid genomic adaptation of *Drosophila melanogaster*. *Proceedings of the National*  
768 *Academy of Sciences*, **116**:20025–20032.
- 769 Sánchez, G. and J. Corral. 1997. Teosinte distribution in Mexico. In F. C. E. J.A. Serratos,  
770 MC Willcox, editor, *Gene Flow Among Maize Landraces, Improved Maize Varieties and*  
771 *Teosinte: Implications for Transgenic Maize*, pages 18–39. INIFAP, CIMMYT and CNBA.
- 772 Sawers, R. J. H., M. N. Gebreselassie, D. P. Janos, and U. Paszkowski. 2009. Characterizing  
773 variation in mycorrhiza effect among diverse plant varieties. *Theoretical and Applied*  
774 *Genetics*, **120**:1029–1039.
- 775 Schwartz, M. W. and J. D. Hoeksema. 1998. Specialization and resource trade: biological  
776 markets as a model of mutualisms. *Ecology*, **79**:1029–1038.
- 777 Smith, S. E., E. Facelli, S. Pope, and F. A. Smith. 2010. Plant performance in stress-  
778 ful environments: interpreting new and established knowledge of the roles of arbuscular  
779 mycorrhizas. *Plant and Soil*, **326**:3–20.
- 780 Smith, S. E. and D. J. Read. 2008. *Mycorrhizal symbiosis*. Academic press, London, 3rd  
781 edition.
- 782 Spiegelhalter, D. J., N. G. Best, B. P. Carlin, and A. Van Der Linde. 2002. Bayesian measures  
783 of model complexity and fit. *Journal of the Royal Statistical Society: Series B (Statistical*  
784 *Methodology)*, **64**:583–639.
- 785 Strauss, S. Y. and R. E. Irwin. 2004. Ecological and evolutionary consequences of multispecies  
786 plant-animal interactions. *Annual Review of Ecology, Evolution, and Systematics*, **35**:435–  
787 466.
- 788 Tabachnick, B. G., L. S. Fidell, and J. B. Ullman. 2007. *Using multivariate statistics*,  
789 volume 5. Pearson Boston, MA.
- 790 Thompson, J. N. 1982. *Interaction and coevolution*. John Wiley & Sons, Inc.
- 791 Thompson, J. N. 2005. *The geographic mosaic of coevolution*. University of Chicago Press,  
792 Chicago.
- 793 Toju, H., P. R. Guimarães, J. M. Olesen, and J. N. Thompson. 2014. Assembly of complex  
794 plant–fungus networks. *Nature Communications*, **5**:5273.

- 795 Trøjelsgaard, K., P. Jordano, D. W. Carstensen, and J. M. Olesen. 2015. Geographical  
796 variation in mutualistic networks: similarity, turnover and partner fidelity. *Proceedings of*  
797 *the Royal Society B: Biological Sciences*, **282**:20142925.
- 798 Turnbaugh, P. J., F. Bäckhed, L. Fulton, and J. I. Gordon. 2008. Diet-induced obesity is  
799 linked to marked but reversible alterations in the mouse distal gut microbiome. *Cell host*  
800 *& Microbe*, **3**:213–223.
- 801 Van Nuland, M. E., J. K. Bailey, and J. A. Schweitzer. 2017. Divergent plant–soil feedbacks  
802 could alter future elevation ranges and ecosystem dynamics. *Nature Ecology & Evolution*,  
803 **1**:1–10.
- 804 Veen, G., J. R. De Long, P. Kardol, M. K. Sundqvist, L. B. Snoek, and D. A. Wardle. 2017.  
805 Coordinated responses of soil communities to elevation in three subarctic vegetation types.  
806 *Oikos*, **126**:1586–1599.
- 807 Venables, W. N. and B. D. Ripley. 2002. *Modern Applied Statistics with S*. Springer, New  
808 York, fourth edition. ISBN 0-387-95457-0.
- 809 Vieira, S., J. Sikorski, S. Dietz, K. Herz, M. Schruppf, H. Bruelheide, D. Scheel, M. W.  
810 Friedrich, and J. Overmann. 2020. Drivers of the composition of active rhizosphere bac-  
811 terial communities in temperate grasslands. *The ISME journal*, **14**:463–475.
- 812 Vierheilig, H., P. Schweiger, and M. Brundrett. 2005. An overview of methods for the  
813 detection and observation of arbuscular mycorrhizal fungi in roots. *Physiologia Plantarum*,  
814 **125**:393–404.
- 815 Zhu, X.-C., F.-B. Song, and H.-W. Xu. 2009. Arbuscular mycorrhizae improves low temper-  
816 ature stress in maize via alterations in host water status and photosynthesis. *Plant Soil*,  
817 **331**:129–137.

## 1 Supporting Information

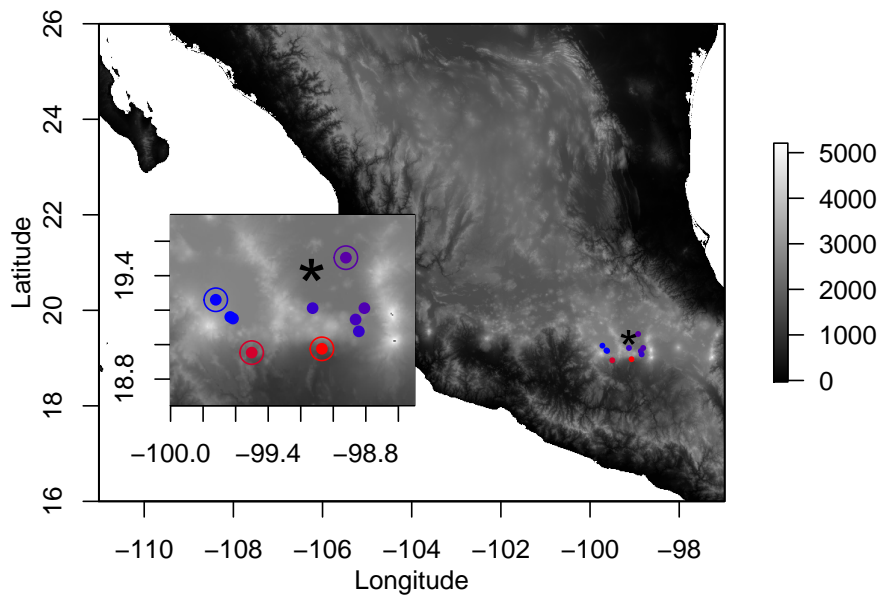

Figure S1: Locations of source sites for teosinte and rhizosphere biota (points), with respect to Mexico City (asterisk), and elevation (color scale, meters above sea level). Inset shows zoom for detail of geographic features around sites, as well as circling the sites from which rhizosphere biota was applied to all plants (see Figure S2, and O'Brien et al., 2019; elevation data from Hijmans et al., 2005).

Table S1: Sampling site abiotic characteristics. Climate and elevation data downloaded from BioClim (Hijmans et al., 2005) extracted with raster in R (Hijmans, 2015). MAT, mean annual temperature in °C; TAP, total annual precipitation in mm; SWC (%), soil water holding capacity. Soil testing service was purchased from INIFAP in Celaya, Gto, methods as provided. Inorganic N was KCl extraction with MgO distillation, P was quantified with the Bray method. K, Ca, Mg, and Na were extracted in ammonium acetate 1N at pH7, while Fe, Mn, Cu, and Zn were extracted with diethylenetriaminepentaacetic acid. Both metal groups were quantified with atomic absorption or inductively coupled plasma. Elevation is in meters above sea level. Soil elements are in micrograms per gram of dry weight (equivalently, ppm). A \* indicates sites used as rhizosphere inocula across all populations of teosinte. A † indicates measurements or extracted variables also reported in O'Brien et al. (2019). Growing season for teosinte is in the warmer, wetter, portion of the year. Greenhouse average temperature from first possible germination day to last harvest day was 23.8 °C, average night temperature for the same period was 19.4 °C, and relative humidity average was 61.7.

|             | Calimaya<br>Upper | Toluca* | Calimaya<br>Lower | San<br>Matías<br>Cuijingo | San<br>Francisco<br>Pedregal | Tenango<br>Del<br>Aire | San<br>Mateo<br>Tezoquipan | Texcoco* | Malinalco* | Tepoztlán* |
|-------------|-------------------|---------|-------------------|---------------------------|------------------------------|------------------------|----------------------------|----------|------------|------------|
| Longitude   | -99.633           | -99.722 | -99.616           | -98.843                   | -99.127                      | -98.863                | -98.809                    | -98.922  | -99.501    | -99.070    |
| Latitude    | 19.161            | 19.260  | 19.151            | 19.077                    | 19.212                       | 19.146                 | 19.212                     | 19.505   | 18.954     | 18.976     |
| MAT†        | 12.9              | 13.0    | 13.2              | 14.3                      | 14.4                         | 14.7                   | 15.0                       | 15.3     | 18.6       | 19.8       |
| TAP†        | 857               | 836     | 828               | 926                       | 935                          | 817                    | 730                        | 585      | 928        | 966        |
| Elevation†  | 2792              | 2776    | 2698              | 2491.5                    | 2507                         | 2408                   | 2353                       | 2253     | 1881       | 1665       |
| P (Bray)    | 71.1              | 29.7    | 39.2              | 27.1                      | 44.3                         | 48.3                   | 68.5                       | 175      | 223        | 33.3       |
| Inorganic N | 16.2              | 17.6    | 14.1              | 12.7                      | 13.4                         | 15.5                   | 12.0                       | 13.4     | 16.9       | 12.0       |
| SWC†        | 23.3              | 33.0    | 21.8              | 33.0                      | 33.8                         | 27.8                   | 30.8                       | 40.5     | 55.5       | 30.0       |
| K           | 142               | 143     | 96.3              | 261                       | 498                          | 189                    | 315                        | 1055     | 827        | 428        |
| Ca          | 749               | 1181    | 354               | 1034                      | 966                          | 757                    | 1575                       | 2710     | 4076       | 915        |
| Mg          | 26.2              | 286     | 55.5              | 170                       | 167                          | 240                    | 227                        | 660      | 527        | 290        |
| Na          | 25.9              | 34.3    | 26.4              | 10.3                      | 27.5                         | 10.7                   | 14.8                       | 419      | 31.5       | 28.2       |
| Fe          | 31.8              | 176     | 25.9              | 64.8                      | 34.5                         | 56.0                   | 53.8                       | 29.6     | 81.8       | 58.6       |
| Zn          | 0.67              | 3.25    | 0.39              | 1.24                      | 2.63                         | 1.81                   | 7.17                       | 10.5     | 48.7       | 1.94       |
| Mn          | 4.63              | 75.0    | 2.23              | 5.95                      | 2.51                         | 5.94                   | 6.02                       | 6.28     | 20.5       | 15.7       |
| Cu          | 0.38              | 1.49    | 0.23              | 0.97                      | 1.07                         | 0.88                   | 1.4                        | 2.12     | 0.96       | 1          |

Table S2: Sampling site biotic characteristics. Coarse phenology was approximate qualitative percentages at two metrics scored by visually estimating the population at the time of seed collection. Plants that remained at least partly green were “Alive” (others were fully senesced). Plants with undeveloped fruit (even if also fully dead) were “Immature Fruit” (%Immat Fruit), while other plants were either empty of fruit or had mature fruits (%Mat Fruit). Spore counts are per gram of soil used to mix inocula. A \* indicates sites used as rhizosphere inocula across all populations of teosinte. Populations are sorted by increasing MAT, see Table S1

3

|              | Calimaya<br>Upper | Toluca* | Calimaya<br>Lower | San<br>Matías<br>Cuijingo | San<br>Francisco<br>Pedregal | Tenango<br>Del<br>Aire | San<br>Mateo<br>Tezoquipan | Texcoco* | Malinalco* | Tepoztlán* |
|--------------|-------------------|---------|-------------------|---------------------------|------------------------------|------------------------|----------------------------|----------|------------|------------|
| %Alive       | 8                 | 5       | 2                 | 5                         | 5                            | 2                      | 10                         | 0        | 0          | 0          |
| %Immat Fruit | 45                | 35      | 35                | 15                        | 20                           | 10                     | 10                         | 85       | 10         | 5          |
| %Mat Fruit   | 50                | 60      | 60                | 80                        | 75                           | 80                     | 80                         | 10       | 75         | 75         |
| Spore count  | 1233              | 159     | 532               | 915                       | 762                          | 432                    | 223                        | 174      | 567        | 419        |



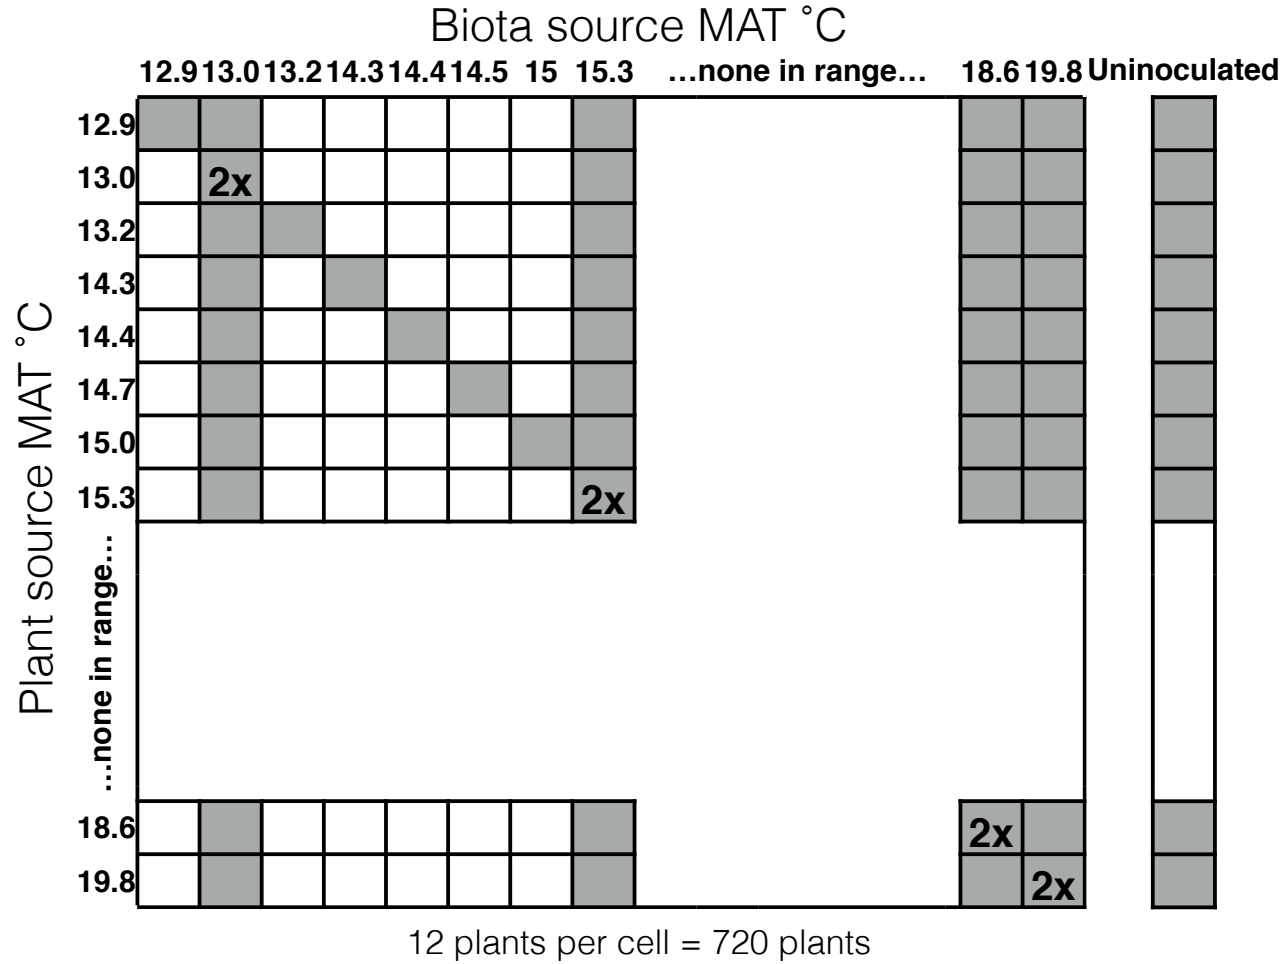

Figure S2: Schematic of experimental design. Outlined columns represent biota sources, outlined rows represent teosinte seed sources. MAT of the site of collection is given for each source. Blank areas represent a significant gap in MAT of sampled sources. Treatments included in the experiment are filled in grey squares and represent 12 pots (one pot per each maternal plant in the field from which seeds were collected), and “2x” denotes double the number of experimental pots (2 pots per field maternal plant, or 24 pots total). All plant populations were also grown uninoculated.

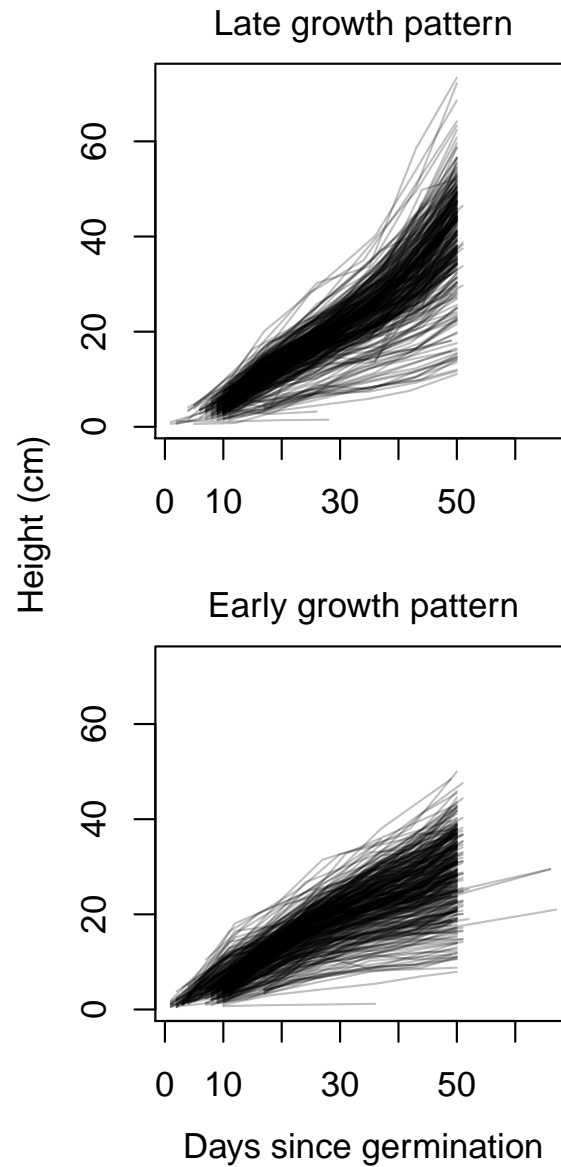

Figure S3: Time series of height through time for all measured plants. Plants fall into either delayed growth pattern (positive squared term in fitted parabola, top) or early growth pattern (negative squared term in fitted parabola, bottom), see Methods text.

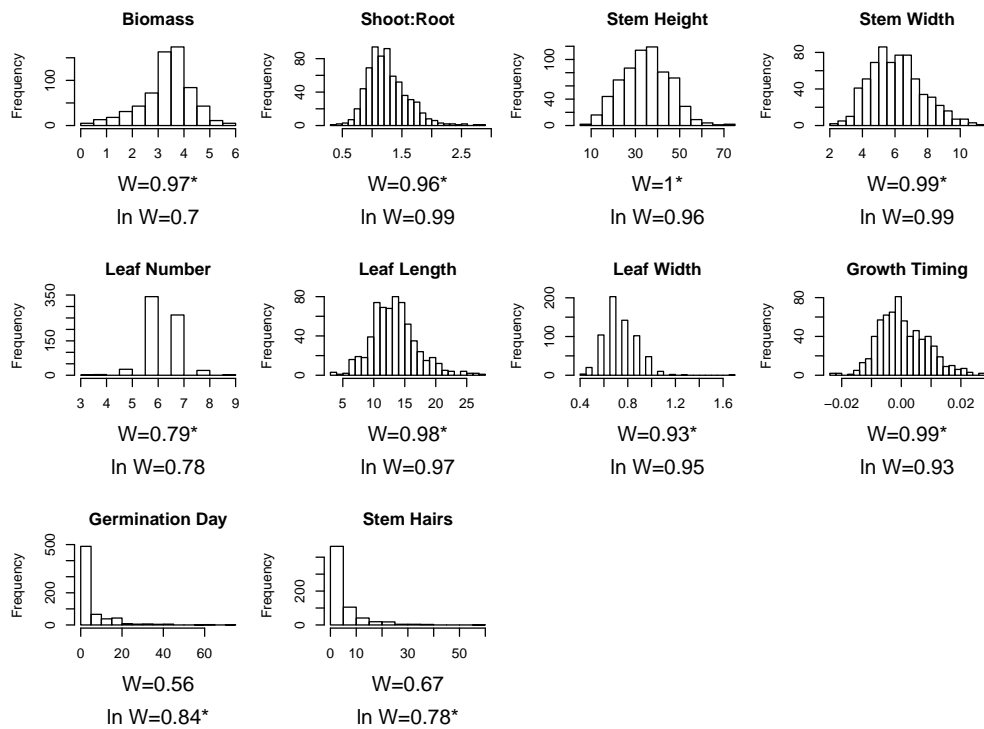

Figure S4: Histogram of measured data for traits. W-statistics from Shapiro tests are included, as well for Shapiro tests for the natural log of the data (plus 1 for Stem Hairs to retain observations with 0 hairs as datapoints), and an asterisk marks which distribution (raw or natural log) was used in analyses.

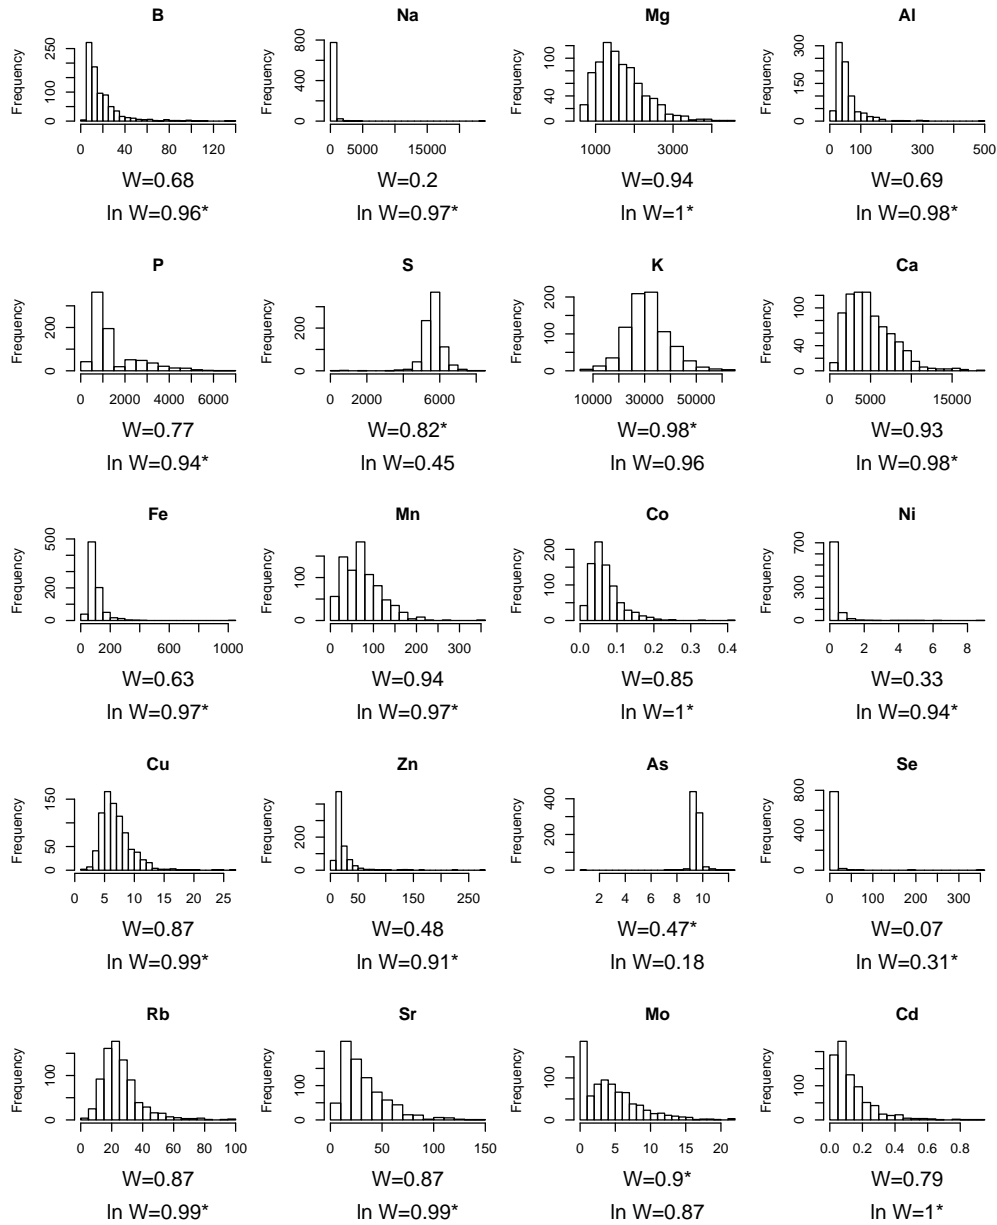

Figure S5: Histogram of measured data for tissue element concentrations (by weight). W-statistics from Shapiro tests are included, as well for Shapiro tests for the natural log of the data, and an asterisk marks which distribution (raw or natural log) was used in analyses.

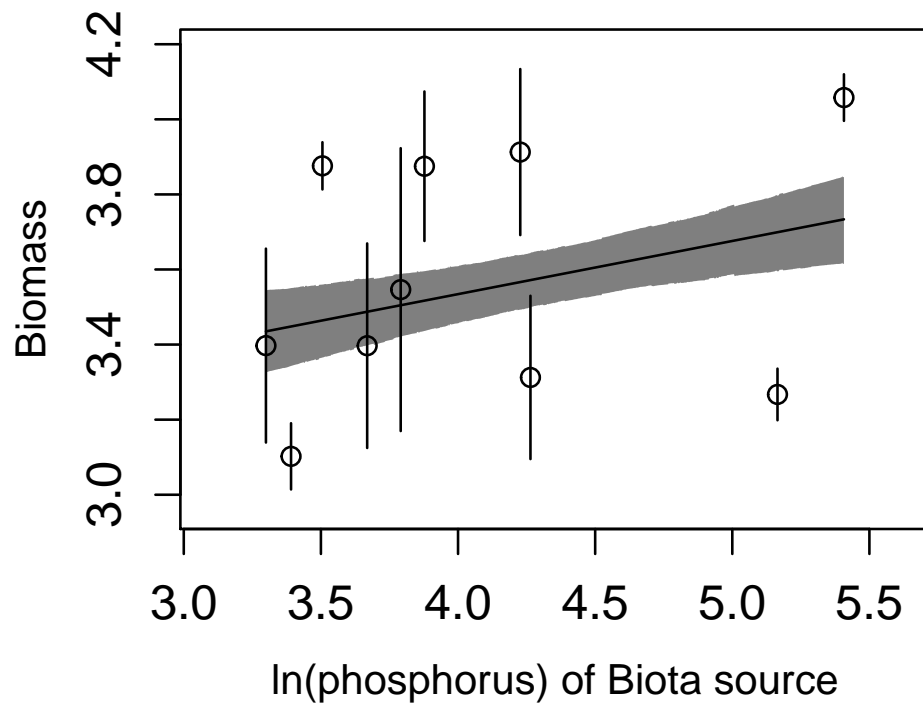

Figure S6: Best model of those including phosphorus at the source site as the explanatory environmental variable. Note this model fits worse than the model using mean annual temperature, but this figure is included for comparison. Only  $\beta_{E_B}$  is significant.

Table S3: All element concentrations are in micrograms per gram dry weight, but were logged where this improved normality (based on the W statistic of a Shapiro test in R, those not logged marked with †; see main text, Figures S4, S5. Intercepts are significantly different from 0, unless indicated with “n.s.”. For slopes pMCMC of interest are indicated with: \*\*\* is < 0.001, \*\* < 0.01, \* is < 0.05, . is < 0.1. Models were fit with MCMCglmm (Hadfield, 2010), with 13,000 iterations, 3,000 burn-in, and thinning by 10. Note pMCMC values are not multiple-test corrected.

| Trait or element            | Live intercept | Live Slope | Sibling Intercept | Sibling Slope |
|-----------------------------|----------------|------------|-------------------|---------------|
| Biomass                     | 2.58           | 0.91***    | 3.48              | -0.56***      |
| Shoot:Root                  | 1.28           | -0.028     | 1.28              | 0.008         |
| Height cm                   | 34.20          | 0.55       | 28.22             | 3.02***       |
| Stem width mm               | 5.48           | 0.75***    | 7.26              | -0.79***      |
| Leaf Number                 | 6.34           | 0.097      | 6.54              | -0.002        |
| Leaf Length cm              | 13.09          | 0.28       | 10.67             | 0.49***       |
| Leaf Width cm               | 0.75           | 0.013      | 0.59              | 0.027*        |
| Growth Acceleration         | 0.0025         | -0.0022**  | 0.0012 n.s.       | 0.0002        |
| Germination Day†            | 1.37           | 0.10       | 1.15              | 0.035***      |
| Hairs per cm <sup>2</sup> † | 0.97           | 0.013      | 0.80              | 0.045***      |
| B                           | 2.60           | -0.046     | 2.03              | 0.18**        |
| Na                          | 5.62           | 0.011      | 5.48              | 0.029         |
| Mg                          | 7.33           | 0.031      | 5.30              | 0.28***       |
| Al                          | 3.76           | 0.032      | 3.71              | 0.020         |
| P                           | 6.32           | 0.53***    | 7.08              | -0.037        |
| S†                          | 5778           | -172***    | 4683              | 0.16***       |
| K†                          | 33086          | -0383      | 29500             | 0.097.        |
| Ca                          | 8.71           | -0.21***   | 6.67              | 0.21***       |
| Fe                          | 4.61           | -0.079*    | 4.50              | 0.0065        |
| Mn                          | 4.42           | -0.016     | 3.37              | 0.23***       |
| Co                          | -2.67          | -0.042     | -2.59             | 0.059         |
| Ni                          | -1.34          | -0.13*     | -1.49             | 0.019         |
| Cu                          | 2.17           | -0.31***   | 1.63              | 0.10*         |
| Zn                          | 2.80           | -0.039     | 3.01              | -0.087        |
| As†                         | 9.48           | 0.063      | 9.27              | 0.03          |
| Se                          | 2.77           | -0.0063    | 2.19              | 0.20***       |
| Rb                          | 2.81           | 0.27***    | 2.61              | 0.17***       |
| Sr                          | 3.53           | -0.17**    | 2.75              | 0.17***       |
| Mo†                         | 9.78           | -4.72***   | 3.85              | 0.11***       |
| Cd                          | -1.78          | -0.41***   | -1.71             | 0.27***       |

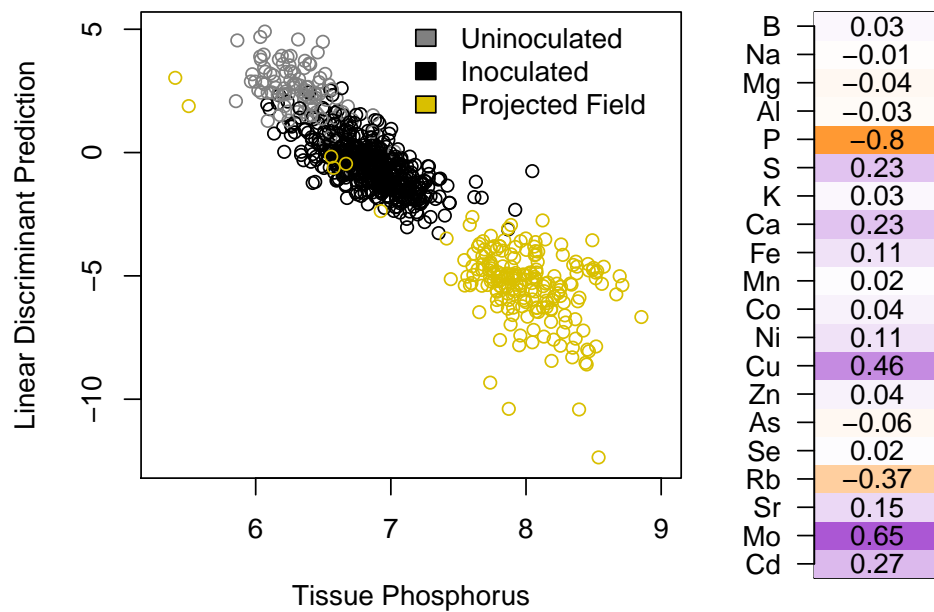

Figure S7: Left, linear discriminant analysis of elemental profiles between inoculated (black) and uninoculated (grey) plotted against tissue phosphorus (logged values). Projections for field plants in yellow. Right, correlations of individual element concentrations with the resulting LDA prediction scores in orange (negative) or purple (positive), with stronger colors indicating stronger  $\rho$ .



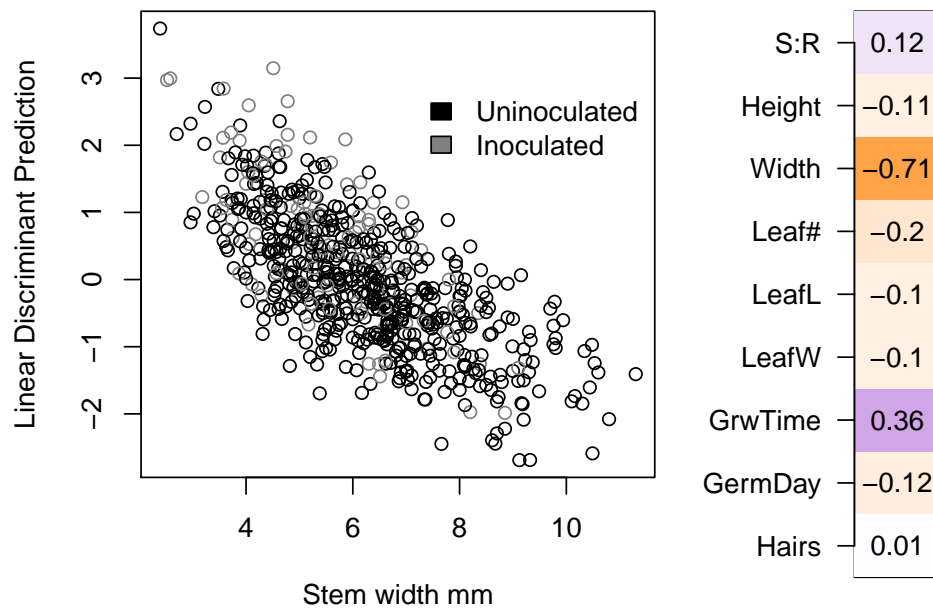

Figure S8: Left, linear discriminant analysis of traits between inoculated (black) and uninoculated (grey) plants relies primarily on stem width. Right, correlations of individual traits with the resulting LDA prediction scores in orange (negative) or purple (positive), with stronger colors matching strength of  $\rho$ .

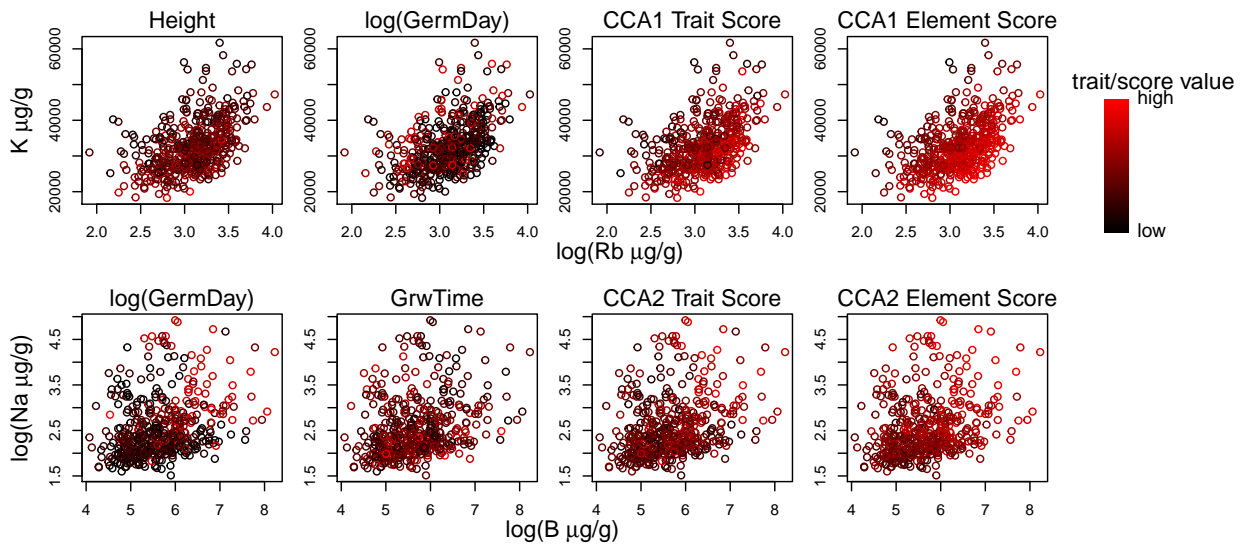

Figure S9: Visualizing a subset of the multivariate relationships identified by the CCA. CCA axes identify correlations in highly multivariate space; meaning, they often include shifts in the relative concentrations of elements to each other, or relative values of traits to each other. Plots in the upper row show some of the relationships identified in the first CCA axis: rubidium and plant height load strongly on this axis in the positive direction, and most other elements (potassium here, for example), as well as the log of days until germination load in the negative direction. Plants that were relatively higher in rubidium for a given concentration of potassium (points shifted towards the upper left corners of plots) were taller, germinate earlier, and had higher scores on the CCA axis. Plots in the lower row show examples of the multivariate relationships identified by the second CCA axis: boron, sodium, and the log of germination day load strongly in the positive direction on this axis, while the timing of vegetative growth loads negatively. Plants that had higher levels of both boron and sodium in tissues (those in the top right corners only) germinated later but grew fastest right after germinating. See Figure 2 for complete multivariate CCA axis loadings. Abbreviations: log(GermDay), natural log of days until germination; GrwTime, timing of vegetative growth; standard elemental abbreviations. The natural log of elemental concentrations is shown here when logged data were used in the analyses (Figure S5).

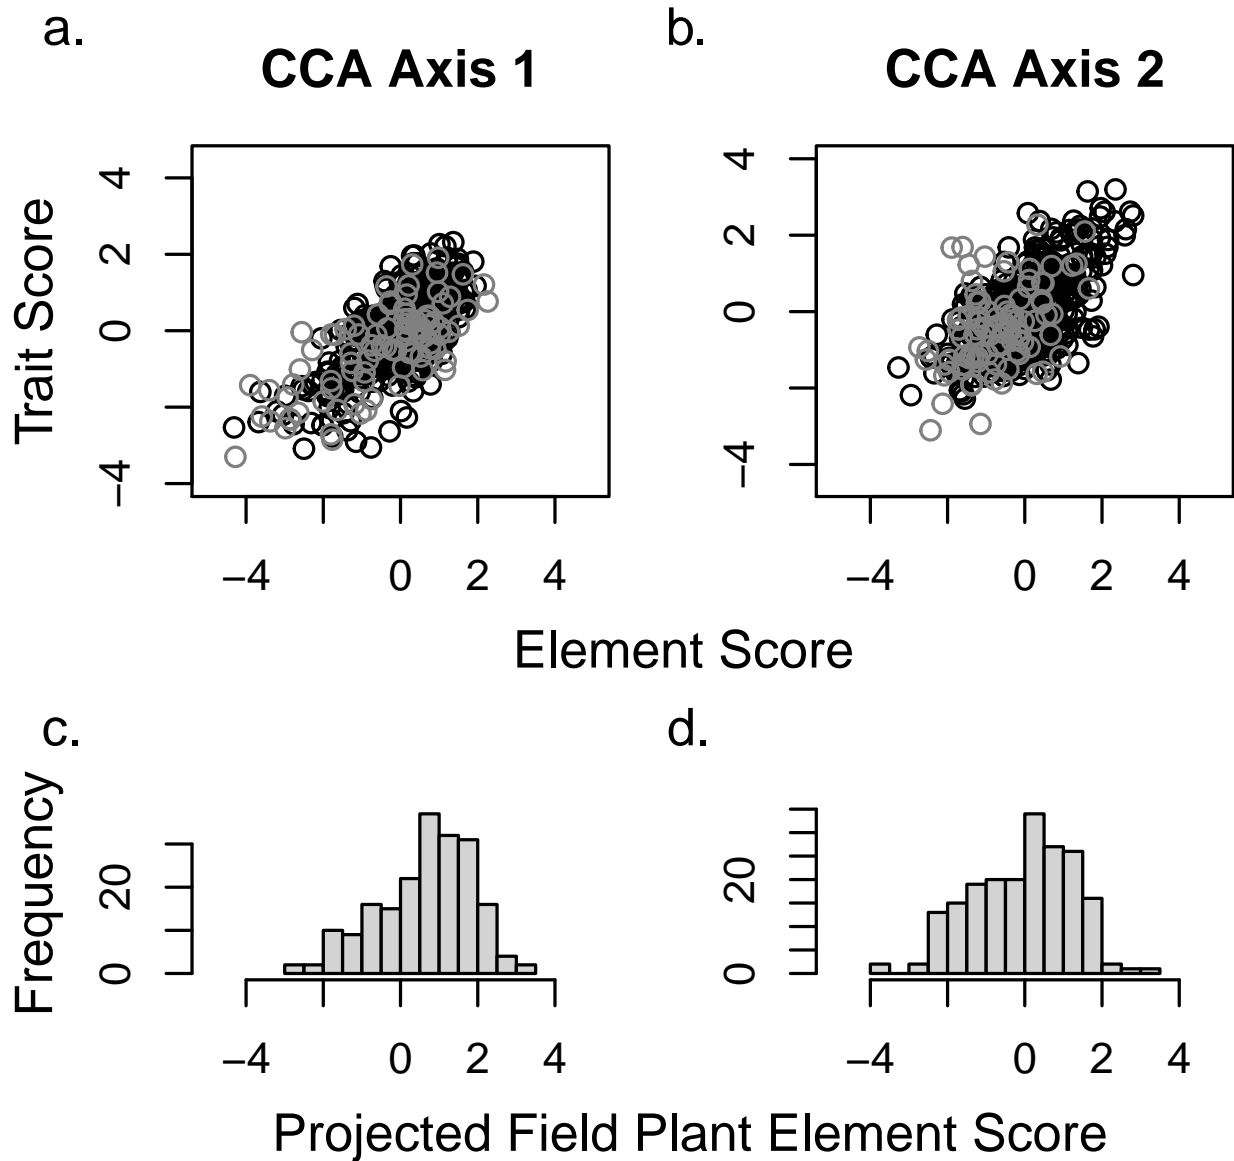

Figure S10: Projections of field and uninoculated greenhouse plants onto the CCA axes. CCA plots of both x and y variables for axis 1 (a) and 2 (b), see also 2, showing inoculated greenhouse plants in black, and uninoculated greenhouse plants in grey. Histograms of x-axis projections of elements measured in field plants (full trait data were not available for field plants) for first (c) and second (d) CCA axes.

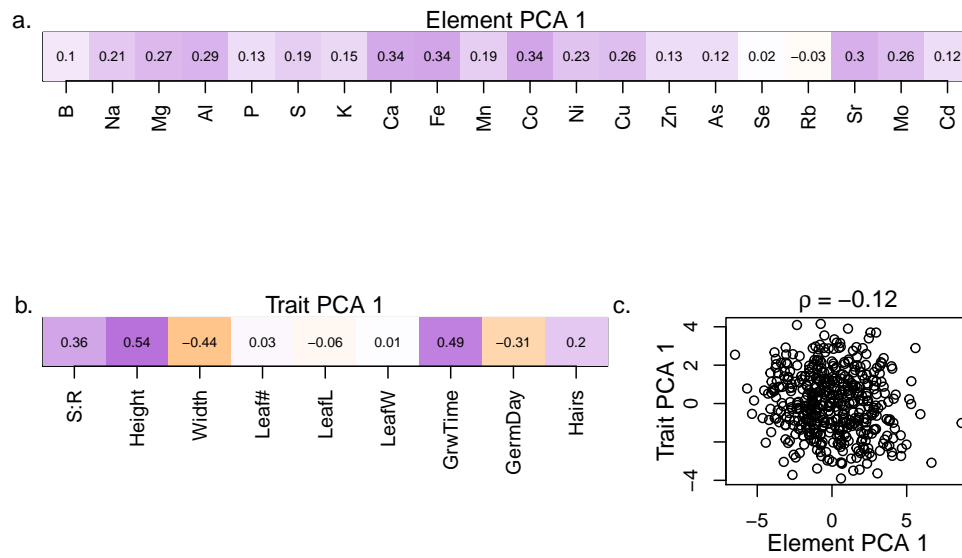

Figure S11: Loadings of elements onto the first axis of the PCA of element profile data alone (a). Loadings of traits onto the first axis of the PCA of trait data alone (b). In (c), scores for plants on the first axis of each respective PCA are plotted against each other, showing no strong relationship. Abbreviations of traits and elements are as elsewhere.

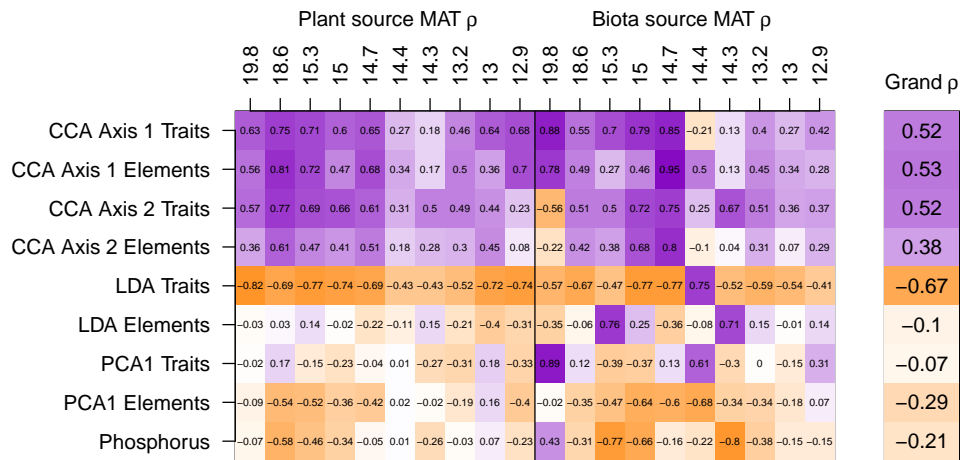

Figure S12: Correlation of multivariate axes with biomass three different ways: within plant source mean annual temperature (MAT, but across families, replicates and biota source MAT), within biota source MAT (but across families, replicates and plant source MAT), and across all data (Grand  $\rho$ ). Note that correlations within biota source MAT are based on sympatric combinations only (plants from the same site) for most sites (MAT 15, 14.7, 14.4, 14.3, 13.2, and 12.9°C). Colors are purple for positive correlations and orange for negative correlations, with color strength reflecting strength of correlation.

|                        |                      | CC1 elmt | CC2 elmt | Height  | Germ    | StemW   | LDA elmt | LDA trt   | PCA1 trt  | PCA1 elmt |
|------------------------|----------------------|----------|----------|---------|---------|---------|----------|-----------|-----------|-----------|
| Intercept              | $a$                  | -0.33    | -2.75**  | 75.7**  | -0.91** | -2.24** | 0.18     | 4.17**    | 8.22**    | -0.62     |
| Biota source Env.      | $\beta_B$            | 0.18**   | 0.068**  | –       | 0.0012  | 0.020** | -0.027** | -0.019**  | -0.0097** | -0.012**  |
| Plant source Env.      | $\beta_P$            | -0.17**  | 0.11**   | -0.26** | 0.017** | 0.034** | 0.0099.  | -0.0075** | -0.044**  | 0.017**   |
| Sympatry               | $\beta_S$            | 1.63*    | –        | –       | –       | 2.28*   | –        | -2.16**   | –         | –         |
| Sympatry $\times$ Env. | $\beta_{E \times S}$ | -0.097*  | –        | –       | –       | -0.014* | –        | 0.013**   | –         | –         |
| Best Env.              |                      | MAT      | MAT      | MAT     | MAT     | MAT     | SWC      | MAT       | MAT       | MAT       |

Table S4: Biota and plant source effects on plant values for select other response values including: the top trait on each of the first two CCA axes between trait and element matrices (height and germination), stem width (since it was measured in the field and somewhat strongly correlated to CCA2), the first axis of each PCA for element and trait values separately (agnostic approach for trait-ion linkage), and LDA axes. Abbreviations: elmt is element; trt is trait; Germ is the natural log of the germination day, and StemW is Stem width. Intercepts, representing values for 0 MAT, are not meaningful. –: not included in best model \*\*: pMCMC < 0.01, \*: pMCMC < 0.05.

|            | Intercept | $\beta_{MAT}$ | $\beta_C$ | $\beta_{MAT \times C}$ |
|------------|-----------|---------------|-----------|------------------------|
| <b>LDA</b> | 2.29*     | -0.014**      | -2.05.*   | –                      |
| <b>PCA</b> | -2.60**   | –             | –         | –                      |

Table S5: Best models fitted to selected further response variables for plants in the field: projections of the field elemental profiles onto the LDA axis and first PCA axis for elemental profiles from the greenhouse data. For each response variable, we report the model coefficients of the best model in rows. Significance of intercepts is not meaningful, representing values for 0 °C. –: not included in best model, \*\*: pMCMC < 0.01, \*: pMCMC < 0.05, ..: pMCMC < 0.1.

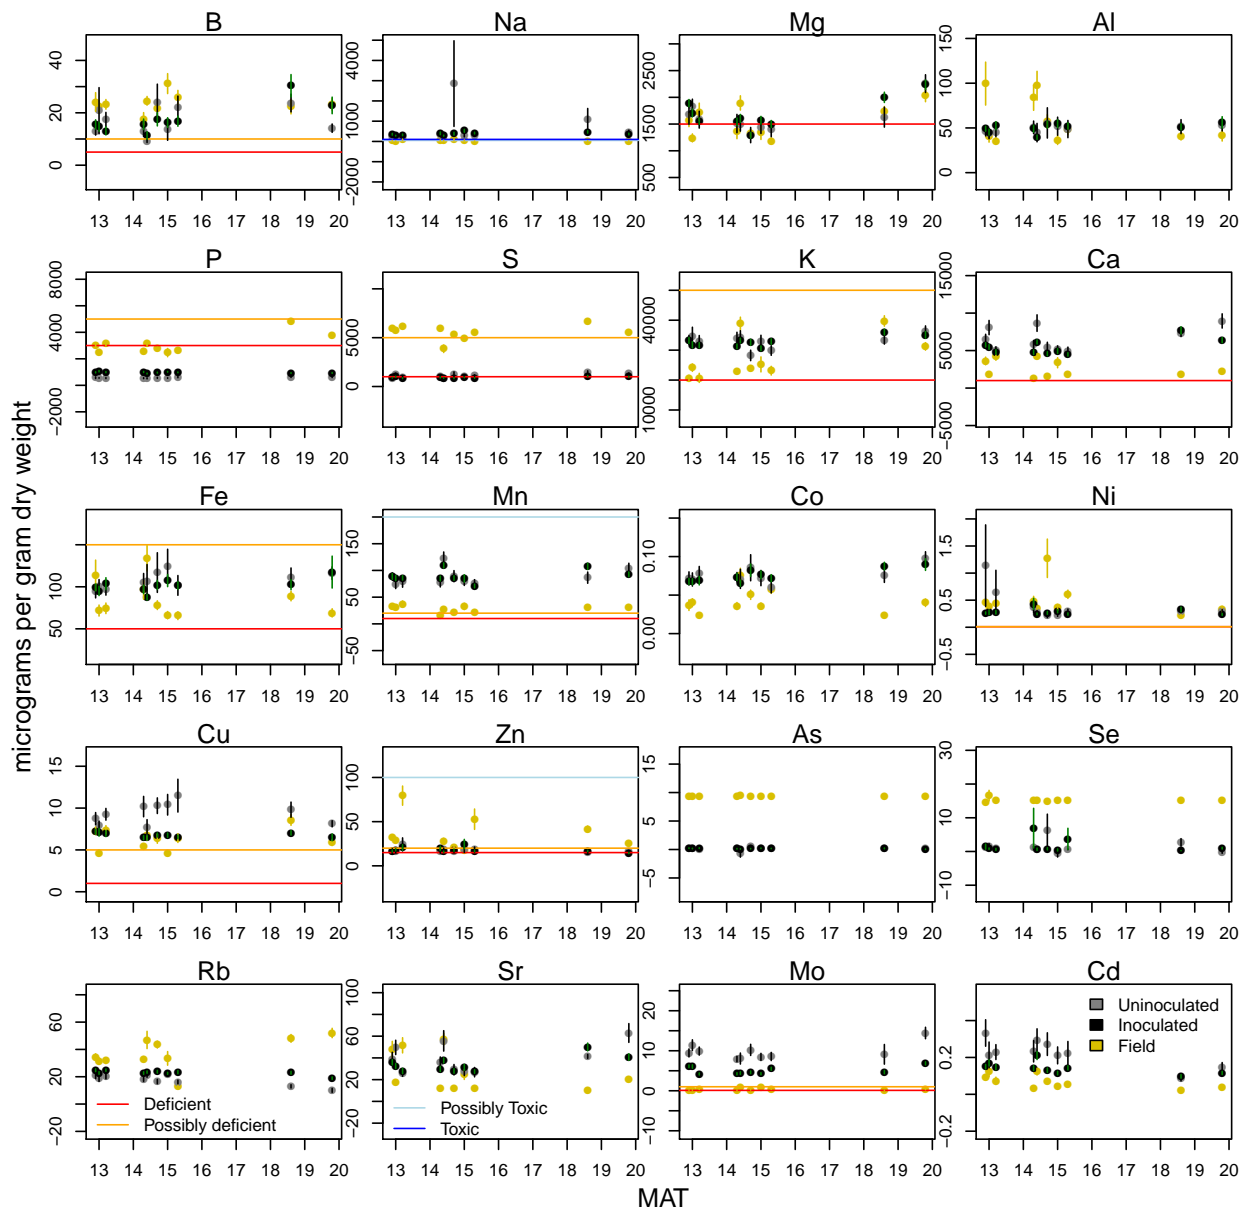

Figure S13: Average measured tissue element concentrations ( $\mu\text{g g}^{-1}$  using dry weight) for field (yellow), greenhouse inoculated (black) and uninoculated (grey) plants plotted against mean annual temperature of the field site. Vertical bars indicate one standard error of the mean. Horizontal lines indicate a value at which that element is very likely (red) or possibly (orange) limiting growth due to deficiency, or where that element is very likely (dark blue) or possibly (light blue) limiting growth due to toxicity (values from maize, grasses or plants broadly as available in Marschner, 2011). In many cases, one or more thresholds are far from actual tissue concentrations and are not visible. Seven elements (Al, Co, Se, Rb, Sr, and Cd) have no visible thresholds because they have no, or uncertain, beneficial concentrations and are not near any toxicity threshold.
